# Supplementary material for: Understanding the thermal stability of apalutamide crystalline solvates through crystal structure analyses and computational studies
Source: Royal Society of Chemistry journal article supplement (doi:10.1039/d2ce00216g), 2022-01-01
Supplement: d2ce00216g1.pdf [file d2ce00216g1.pdf]

## **Understanding the thermal stability of apalutamide crystalline solvates through crystal structure analyses and computational studies**

Jupally Prashanth<sup>ab</sup>, A. Sivalakshmi Devi<sup>c</sup>, Artem O. Surov<sup>d\*</sup>, Alexander P. Voronin<sup>e</sup>, Andrei V. Churakov<sup>e</sup>, Sridhar Balasubramanian<sup>ab\*</sup>

<sup>a</sup>Centre for X-ray Crystallography, Department of Analytical & Structural Chemistry, CSIR-Indian Institute of Chemical Technology, Tarnaka, Uppal Road, Hyderabad-500007, Telangana, India.

<sup>b</sup>Academy of Scientific and Innovative Research (AcSIR), Uttar Pradesh- 201 002, India

<sup>c</sup>Laraus Labs Ltd., Ds1, Ikp Knowledge Park, Genome Valley, Shameerpet, Hyderabad, Turkapally, Rangareddy – 500078.

<sup>d</sup>G.A. Krestov Institute of Solution Chemistry RAS, 153045, Ivanovo, Russia.

<sup>e</sup>Institute of General and Inorganic Chemistry RAS, Leninsky Prosp. 31,119991, Moscow, Russia.

**Table S1.** Experimental details

|                             | (APA)                                         | (APA-DMF-2-1)                                  | (KA1087_0m_APA-DMF-2:1)                                              | (APA-DMF_1-1)                              |
|-----------------------------|-----------------------------------------------|------------------------------------------------|----------------------------------------------------------------------|--------------------------------------------|
| CCDC                        | 2121550                                       | 2151552                                        | 2152151                                                              | 2151553                                    |
| Crystal data                |                                               |                                                |                                                                      |                                            |
| Chemical formula            | $C_{21}H_{15}F_4N_5O_2S$                      | $2(C_{21}H_{15}F_4N_5O_2S) \cdot C_3H_7N$<br>O | $2(C_{21}H_{15}F_4N_5O_2S) \cdot C_3H_7N$<br>O                       | $C_{21}H_{16}F_4N_5O_2S \cdot C_3H_7NO$    |
| $M_r$                       | 477.44                                        | 1027.97                                        | 1027.97                                                              | 550.53                                     |
| Crystal system, space group | Monoclinic, $P2_1/c$                          | Triclinic, $P1$                                | Triclinic, $P1$                                                      | Orthorhombic, $Pca2_1$                     |
| Temperature (K)             | 100                                           | 150                                            | 100                                                                  | 100                                        |
| $a, b, c$ (Å)               | 17.7813 (6),<br>13.0140 (4),<br>18.4676 (6)   | 12.3974 (9), 17.3988 (15),<br>23.2772 (17)     | 12.3588 (11), 17.3486 (15),<br>23.177 (2)                            | 17.3059 (19), 12.2220<br>(13), 47.409 (5)  |
| $\alpha, \beta, \gamma$ (°) | 90, 100.8839<br>(11), 90                      | 68.343 (3), 81.611 (3),<br>89.765 (3)          | 68.252 (5), 81.670 (5),<br>89.735 (5)                                | 90, 90, 90                                 |
| $V$ (Å <sup>3</sup> )       | 4196.6 (2)                                    | 4609.8 (6)                                     | 4560.4 (7)                                                           | 10027.6 (19)                               |
| $Z$                         | 8                                             | 4                                              | 4                                                                    | 16                                         |
| Radiation type              | Mo $K\alpha$                                  | Mo $K\alpha$                                   | Mo $K\alpha$                                                         | Mo $K\alpha$                               |
| $\mu$ (mm <sup>-1</sup> )   | 0.22                                          | 0.21                                           | 0.21                                                                 | 0.20                                       |
| Crystal size (mm)           | 0.25 × 0.20 ×<br>0.10                         | 0.40 × 0.20 × 0.01                             | 0.22 × 0.11 × 0.09                                                   | 0.32 × 0.28 × 0.16                         |
| Data collection             |                                               |                                                |                                                                      |                                            |
| Diffractometer              | Bruker <i>SMART APEX II</i>                   | Bruker <i>SMART APEX II</i>                    | Bruker D8 QUEST<br>PHOTON-100                                        | Bruker D8 Venture                          |
| Absorption correction       | Multi-scan<br><i>SADABS</i><br>(Bruker, 2016) | Multi-scan<br><i>SADABS</i> (Bruker, 2016)     | Multi-scan<br><i>SADABS</i> 2016/2: Krause,<br>L., Herbst-Irmer, R., | Multi-scan<br><i>SADABS</i> (Bruker, 2016) |

|                                                                            |                                                                                     |                                                                                    |                                                                        |                                                                                      |
|----------------------------------------------------------------------------|-------------------------------------------------------------------------------------|------------------------------------------------------------------------------------|------------------------------------------------------------------------|--------------------------------------------------------------------------------------|
| $T_{\min}, T_{\max}$                                                       | 0.621, 0.746                                                                        | 0.652, 0.783                                                                       | 0.652, 0.783                                                           | 0.494, 0.746                                                                         |
| No. of measured, independent and observed [ $I > 2\sigma(I)$ ] reflections | 42501, 9154, 7500                                                                   | 39826, 15816, 9831                                                                 | 45004, 45004, 32486                                                    | 64602, 20533, 14775                                                                  |
| $R_{\text{int}}$                                                           | 0.039                                                                               | 0.070                                                                              | ?                                                                      | 0.073                                                                                |
| $(\sin \theta/\lambda)_{\text{max}}$ ( $\text{\AA}^{-1}$ )                 | 0.639                                                                               | 0.596                                                                              | 0.595                                                                  | 0.626                                                                                |
| <b>Refinement</b>                                                          |                                                                                     |                                                                                    |                                                                        |                                                                                      |
| $R[F^2 > 2\sigma(F^2)]$ , $wR(F^2)$ , $S$                                  | 0.043, 0.108, 1.03                                                                  | 0.104, 0.275, 1.06                                                                 | 0.082, 0.193, 1.12                                                     | 0.070, 0.169, 1.08                                                                   |
| No. of reflections                                                         | 9154                                                                                | 15816                                                                              | 45004                                                                  | 20533                                                                                |
| No. of parameters                                                          | 616                                                                                 | 1332                                                                               | 1352                                                                   | 1365                                                                                 |
| No. of restraints                                                          | 0                                                                                   | 3                                                                                  | 0                                                                      | 1                                                                                    |
| H-atom treatment                                                           | H atoms treated by a mixture of independent and constrained refinement              | H atoms treated by a mixture of independent and constrained refinement             | H atoms treated by a mixture of independent and constrained refinement | H atoms treated by a mixture of independent and constrained refinement               |
|                                                                            | $w = 1/[\sigma^2(F_o^2) + (0.0461P)^2 + 28.542P]$<br>where $P = (F_o^2 + 2F_c^2)/3$ | $w = 1/[\sigma^2(F_o^2) + (0.097P)^2 + 28.542P]$<br>where $P = (F_o^2 + 2F_c^2)/3$ | $w = 1/[\sigma^2(F_o^2) + 25.5581P]$<br>where $P = (F_o^2 + 2F_c^2)/3$ | $w = 1/[\sigma^2(F_o^2) + (0.0569P)^2 + 14.5178P]$<br>where $P = (F_o^2 + 2F_c^2)/3$ |

$$+ 2F_c^2)/3$$

|                                                               |             |             |             |                               |
|---------------------------------------------------------------|-------------|-------------|-------------|-------------------------------|
| $\Delta\rho_{\max}, \Delta\rho_{\min}$ (e $\text{\AA}^{-3}$ ) | 1.01, -0.79 | 0.67, -0.36 | 0.68, -0.76 | 0.47, -0.53                   |
| Absolute structure                                            | ?           | ?           | ?           | Refined as an inversion twin. |
| Absolute structure parameter                                  | ?           | ?           | ?           | 0.73 (13)                     |

|                                      |                                                                                                        |                                                                                                     |                                                                                                |                                                                                                     |
|--------------------------------------|--------------------------------------------------------------------------------------------------------|-----------------------------------------------------------------------------------------------------|------------------------------------------------------------------------------------------------|-----------------------------------------------------------------------------------------------------|
|                                      | (KA1156_0m_APA-DOX-2:1)                                                                                | (KA1165_0m_APA-DMA-1:1)                                                                             | (KB02_0m_a_APA-CHY-1:1)                                                                        | (KB22_0m_APA-ACN-1:1)                                                                               |
| CCDC                                 | 2152152                                                                                                | 2152153                                                                                             | 2152154                                                                                        | 2152156                                                                                             |
| Crystal data                         |                                                                                                        |                                                                                                     |                                                                                                |                                                                                                     |
| Chemical formula                     | $2(\text{C}_{21}\text{H}_{15}\text{F}_4\text{N}_5\text{O}_2\text{S})\cdot\text{C}_4\text{H}_8\text{O}$ | $\text{C}_{21}\text{H}_{15}\text{F}_4\text{N}_5\text{O}_2\text{S}\cdot\text{C}_4\text{H}_9\text{N}$ | $\text{C}_{21}\text{H}_{15}\text{F}_4\text{N}_5\text{O}_2\text{S}\cdot\text{C}_6\text{H}_{10}$ | $\text{C}_{21}\text{H}_{15}\text{F}_4\text{N}_5\text{O}_2\text{S}\cdot\text{C}_2\text{H}_3\text{N}$ |
| $M_r$                                | 1042.98                                                                                                | 564.56                                                                                              | 575.58                                                                                         | 518.49                                                                                              |
| Crystal system, space group          | Monoclinic, $C2/c$                                                                                     | Monoclinic, $P2_1/c$                                                                                | Monoclinic, $P2_1/c$                                                                           | Orthorhombic, $Pna2_1$                                                                              |
| Temperature (K)                      | 294                                                                                                    | 294                                                                                                 | 100                                                                                            | 100                                                                                                 |
| $a, b, c$ ( $\text{\AA}$ )           | 41.7833 (6), 13.6224 (2), 17.4061 (3)                                                                  | 22.5794 (15), 13.3362 (7), 18.2192 (11)                                                             | 25.2912 (7), 12.4809 (4), 17.6369 (5)                                                          | 8.9856 (4), 15.2222 (6), 16.9653 (7)                                                                |
| $\alpha, \beta, \gamma$ ( $^\circ$ ) | 90, 110.9090 (7), 90                                                                                   | 90, 90.944 (2), 90                                                                                  | 90, 108.109 (1), 90                                                                            | 90, 90, 90                                                                                          |
| $V$ ( $\text{\AA}^3$ )               | 9254.9 (3)                                                                                             | 5485.5 (6)                                                                                          | 5291.4 (3)                                                                                     | 2320.52 (17)                                                                                        |
| $Z$                                  | 8                                                                                                      | 8                                                                                                   | 8                                                                                              | 4                                                                                                   |
| Radiation type                       | Mo $K\alpha$                                                                                           | Mo $K\alpha$                                                                                        | Mo $K\alpha$                                                                                   | Mo $K\alpha$                                                                                        |
| $\mu$ ( $\text{mm}^{-1}$ )           | 0.21                                                                                                   | 0.18                                                                                                | 0.19                                                                                           | 0.21                                                                                                |
| Crystal size (mm)                    | $0.26 \times 0.22 \times 0.12$                                                                         | $0.28 \times 0.26 \times 0.11$                                                                      | $0.26 \times 0.24 \times 0.18$                                                                 | $0.26 \times 0.22 \times 0.16$                                                                      |

Data collection

|                                                                            |                                                                        |                                                                        |                                                                                                                                              |                                                                                                                                              |
|----------------------------------------------------------------------------|------------------------------------------------------------------------|------------------------------------------------------------------------|----------------------------------------------------------------------------------------------------------------------------------------------|----------------------------------------------------------------------------------------------------------------------------------------------|
| Diffractometer                                                             | Bruker D8 QUEST<br>PHOTON-100                                          | Bruker D8 QUEST<br>PHOTON-100                                          | Bruker D8 QUEST<br>PHOTON-100                                                                                                                | Bruker D8 QUEST<br>PHOTON-100                                                                                                                |
| Absorption correction                                                      | Multi-scan<br><i>SADABS</i> 2014/5                                     | Multi-scan<br><i>SADABS</i> 2014/5                                     | Multi-scan<br><i>SADABS</i> 2016/2:<br>Krause, L., Herbst-<br>Irmer, R., Sheldrick<br>G.M. & Stalke D., J.<br>Appl. Cryst. 48 (2015)<br>3-10 | Multi-scan<br><i>SADABS</i> 2016/2:<br>Krause, L., Herbst-<br>Irmer, R., Sheldrick<br>G.M. & Stalke D., J.<br>Appl. Cryst. 48 (2015)<br>3-10 |
| $T_{\min}$ , $T_{\max}$                                                    | 0.579, 0.745                                                           | 0.628, 0.746                                                           | 0.630, 0.745                                                                                                                                 | 0.670, 0.746                                                                                                                                 |
| No. of measured, independent and observed [ $I > 2\sigma(I)$ ] reflections | 36635, 9440, 6534                                                      | 50692, 11078, 7054                                                     | 46140, 9019, 5179                                                                                                                            | 36626, 6979, 6697                                                                                                                            |
| $R_{\text{int}}$                                                           | 0.062                                                                  | 0.073                                                                  | 0.104                                                                                                                                        | 0.054                                                                                                                                        |
| $(\sin \theta/\lambda)_{\text{max}}$ ( $\text{\AA}^{-1}$ )                 | 0.625                                                                  | 0.622                                                                  | 0.588                                                                                                                                        | 0.713                                                                                                                                        |
| Refinement                                                                 |                                                                        |                                                                        |                                                                                                                                              |                                                                                                                                              |
| $R[F^2 > 2\sigma(F^2)]$ , $wR(F^2)$ , $S$                                  | 0.083, 0.201, 1.06                                                     | 0.062, 0.167, 1.04                                                     | 0.077, 0.157, 1.04                                                                                                                           | 0.027, 0.071, 1.05                                                                                                                           |
| No. of reflections                                                         | 9440                                                                   | 11078                                                                  | 9019                                                                                                                                         | 6979                                                                                                                                         |
| No. of parameters                                                          | 669                                                                    | 894                                                                    | 815                                                                                                                                          | 330                                                                                                                                          |
| No. of restraints                                                          | 2                                                                      | 423                                                                    | 210                                                                                                                                          | 1                                                                                                                                            |
| H-atom treatment                                                           | H atoms treated by a mixture of independent and constrained refinement | H atoms treated by a mixture of independent and constrained refinement | H atoms treated by a mixture of independent and constrained refinement                                                                       | H atoms treated by a mixture of independent and constrained refinement                                                                       |

|                                                                | refinement                                                                                                        |                                                                                                                    |                                                                                                                   |                                                                                                                              |
|----------------------------------------------------------------|-------------------------------------------------------------------------------------------------------------------|--------------------------------------------------------------------------------------------------------------------|-------------------------------------------------------------------------------------------------------------------|------------------------------------------------------------------------------------------------------------------------------|
|                                                                | $w = 1/[\sigma^2(F_o^2) + (0.0679P)^2 + 56.7028P]$<br>where $P = (F_o^2 + 2F_c^2)/3$                              | $w = 1/[\sigma^2(F_o^2) + (0.0598P)^2 + 2.9625P]$<br>where $P = (F_o^2 + 2F_c^2)/3$                                | $w = 1/[\sigma^2(F_o^2) + (0.0473P)^2 + 9.1283P]$<br>where $P = (F_o^2 + 2F_c^2)/3$                               | $w = 1/[\sigma^2(F_o^2) + (0.0371P)^2 + 0.3003P]$<br>where $P = (F_o^2 + 2F_c^2)/3$                                          |
| $\Delta\rho_{\max}, \Delta\rho_{\min}$<br>(e Å <sup>-3</sup> ) | 0.83, -0.88                                                                                                       | 0.32, -0.35                                                                                                        | 0.65, -0.33                                                                                                       | 0.32, -0.22                                                                                                                  |
| Absolute structure                                             | ?                                                                                                                 | ?                                                                                                                  | ?                                                                                                                 | Flack x determined using 3043 quotients [(I+)-(I-)]/[(I+)+(I-)] (Parsons, Flack and Wagner, Acta Cryst. B69 (2013) 249-259). |
| Absolute structure parameter                                   | ?                                                                                                                 | ?                                                                                                                  | ?                                                                                                                 | 0.03 (2)                                                                                                                     |
|                                                                | (APA-ACE-2:1)                                                                                                     | (KB06_0m_APA-BUT-1:0.5)                                                                                            | (KB101_0m_APA-EtOH-2:1)                                                                                           |                                                                                                                              |
| CCDC                                                           | 2151551                                                                                                           | 2152155                                                                                                            | 2152157                                                                                                           |                                                                                                                              |
| Crystal data                                                   |                                                                                                                   |                                                                                                                    |                                                                                                                   |                                                                                                                              |
| Chemical formula                                               | 2(C <sub>21</sub> H <sub>15</sub> F <sub>4</sub> N <sub>5</sub> O <sub>2</sub> S)·C <sub>3</sub> H <sub>6</sub> O | 2(C <sub>21</sub> H <sub>15</sub> F <sub>4</sub> N <sub>5</sub> O <sub>2</sub> S)·C <sub>4</sub> H <sub>10</sub> O | 2(C <sub>21</sub> H <sub>15</sub> F <sub>4</sub> N <sub>5</sub> O <sub>2</sub> S)·C <sub>2</sub> H <sub>6</sub> O |                                                                                                                              |
| $M_r$                                                          | 1012.96                                                                                                           | 1029.00                                                                                                            | 1000.95                                                                                                           |                                                                                                                              |
| Crystal system, space group                                    | Monoclinic, <i>C2/c</i>                                                                                           | Monoclinic, <i>P2<sub>1</sub>/c</i>                                                                                | Orthorhombic, <i>P2<sub>1</sub>2<sub>1</sub>2</i>                                                                 |                                                                                                                              |
| Temperature (K)                                                | 100                                                                                                               | 100                                                                                                                | 294                                                                                                               |                                                                                                                              |
| $a, b, c$ (Å)                                                  | 43.7534 (14), 12.7915 (5), 17.9103 (6)                                                                            | 19.3859 (8), 16.1915 (3), 7.3833 (1)                                                                               | 16.568 (10), 37.54 (2), 7.364 (5)                                                                                 |                                                                                                                              |
| $\alpha, \beta, \gamma$ (°)                                    | 90, 113.481 (1), 90                                                                                               | 90, 90.171 (5), 90                                                                                                 | 90, 90, 90                                                                                                        |                                                                                                                              |
| $V$ (Å <sup>3</sup> )                                          | 9193.8 (6)                                                                                                        | 2317.51 (11)                                                                                                       | 4580 (5)                                                                                                          |                                                                                                                              |
| $Z$                                                            | 8                                                                                                                 | 2                                                                                                                  | 4                                                                                                                 |                                                                                                                              |

|                                                                                     |                                                                                                                                     |                                                                                                                                     |                                                                                                                                     |
|-------------------------------------------------------------------------------------|-------------------------------------------------------------------------------------------------------------------------------------|-------------------------------------------------------------------------------------------------------------------------------------|-------------------------------------------------------------------------------------------------------------------------------------|
| Radiation type                                                                      | Mo $K\alpha$                                                                                                                        | Mo $K\alpha$                                                                                                                        | Mo $K\alpha$                                                                                                                        |
| $\mu$ ( $\text{mm}^{-1}$ )                                                          | 0.21                                                                                                                                | 0.21                                                                                                                                | 0.21                                                                                                                                |
| Crystal size<br>(mm)                                                                | $0.25 \times 0.20 \times 0.02$                                                                                                      | $0.28 \times 0.22 \times 0.16$                                                                                                      | $0.26 \times 0.24 \times 0.18$                                                                                                      |
| Data collection                                                                     |                                                                                                                                     |                                                                                                                                     |                                                                                                                                     |
| Diffractometer                                                                      | Bruker D8 QUEST PHOTON-100                                                                                                          | Bruker D8 QUEST PHOTON-100                                                                                                          | Bruker D8 QUEST PHOTON-100                                                                                                          |
| Absorption correction                                                               | Multi-scan<br><i>SADABS</i> 2016/2: Krause, L., Herbst-Irmer, R., Sheldrick G.M. & Stalke D., <i>J. Appl. Cryst.</i> 48 (2015) 3-10 | Multi-scan<br><i>SADABS</i> 2016/2: Krause, L., Herbst-Irmer, R., Sheldrick G.M. & Stalke D., <i>J. Appl. Cryst.</i> 48 (2015) 3-10 | Multi-scan<br><i>SADABS</i> 2016/2: Krause, L., Herbst-Irmer, R., Sheldrick G.M. & Stalke D., <i>J. Appl. Cryst.</i> 48 (2015) 3-10 |
| $T_{\min}$ , $T_{\max}$                                                             | 0.623, 0.765                                                                                                                        | 0.556, 0.722                                                                                                                        | 0.473, 0.746                                                                                                                        |
| No. of measured,<br>independent and<br>observed [ $I > 2\sigma(I)$ ]<br>reflections | 43641, 8143, 5609                                                                                                                   | 40466, 7083, 6096                                                                                                                   | 27853, 8064, 5112                                                                                                                   |
| $R_{\text{int}}$                                                                    | 0.064                                                                                                                               | 0.044                                                                                                                               | 0.085                                                                                                                               |
| $(\sin \theta/\lambda)_{\text{max}}$<br>( $\text{\AA}^{-1}$ )                       | 0.596                                                                                                                               | 0.715                                                                                                                               | 0.595                                                                                                                               |
| Refinement                                                                          |                                                                                                                                     |                                                                                                                                     |                                                                                                                                     |
| $R[F^2 > 2\sigma(F^2)]$ ,<br>$wR(F^2)$ , $S$                                        | 0.063, 0.137, 1.05                                                                                                                  | 0.059, 0.136, 1.16                                                                                                                  | 0.070, 0.214, 1.03                                                                                                                  |
| No. of reflections                                                                  | 8143                                                                                                                                | 7083                                                                                                                                | 8064                                                                                                                                |
| No. of parameters                                                                   | 794                                                                                                                                 | 411                                                                                                                                 | 776                                                                                                                                 |
| No. of restraints                                                                   | 22                                                                                                                                  | 3                                                                                                                                   | 562                                                                                                                                 |
| H-atom treatment                                                                    | H atoms treated by a mixture of independent and constrained                                                                         | H-atom parameters constrained                                                                                                       | H-atom parameters constrained                                                                                                       |

## refinement

|                                                                  |                                                    |                                                  |                                                   |
|------------------------------------------------------------------|----------------------------------------------------|--------------------------------------------------|---------------------------------------------------|
|                                                                  | $w = 1/[\sigma^2(F_o^2) + (0.0339P)^2 + 30.2507P]$ | $w = 1/[\sigma^2(F_o^2) + (0.0338P)^2 + 2.710P]$ | $w = 1/[\sigma^2(F_o^2) + (0.1186P)^2 + 0.5342P]$ |
|                                                                  | where $P = (F_o^2 + 2F_c^2)/3$                     | where $P = (F_o^2 + 2F_c^2)/3$                   | where $P = (F_o^2 + 2F_c^2)/3$                    |
| $\Delta\rho_{\max}, \Delta\rho_{\min}$ (e<br>$\text{\AA}^{-3}$ ) | 0.43, -0.35                                        | 0.54, -0.59                                      | 0.56, -0.32                                       |
| Absolute structure                                               | ?                                                  | ?                                                | Refined as an inversion twin.                     |
| Absolute structure parameter                                     | ?                                                  | ?                                                | 0.45 (19)                                         |

Computer programs: *APEX2* (Bruker, 2008), *APEX3* (Bruker, 2018), *APEX3* (Bruker, 2016), *SAINT* (Bruker, 2008), *SAINT* (Bruker, 2018), *SAINT* (Bruker, 2016), Bruker *SAINT*, *SHELXTL* (Sheldrick, 2008), *SHELXT* (Sheldrick, 2016), *SHELXT* 2014/5 (Sheldrick, 2014), *SHELXT* (Sheldrick, 2015), *SHELXL2018/3* (Sheldrick, 2018), *SHELXL2016/6* (Sheldrick, 2016), *SHELXL2014* (Sheldrick, 2015), Bruker *SHELXTL*.



## Single-crystal X-ray diffraction

In all structures (except APA-ACN-1:1 & APA-EtOH-2:1) and aromatic fluorine atoms were positionally disordered over two sites with occupancy ratios 0.795(4)/0.205(4) for molecule B of APA, 0.547(8)/0.453(8), 0.556(10)/0.444(10), 0.508(7)/0.492(7), 0.587(8)/0.413(7) for APA-DMF-2:1 and 0.54(1)/0.46(1), 0.60(1)/0.40(1), 0.56(1)/0.44(1), 0.51(1)/0.49(1) for APA-DMF-1:1, 0.542(7)/0.458(7) for APA-DOX-2:1, 0.879(3)/0.121(3), 0.755(5)/0.245(5) for APA-DMA-1:1, 0.620(7)/0.480(7), 0.667(6)/0.333(6) for APA-CYH-1:1, 0.726(6)/0.274(6) for APA-ACE-2:1, 0.545(4)/0.456(4) for APA-BUT-1:0.5. In APA-ACE-2:1 pyridine ring was positionally disordered with occupancies equal to 0.523(2) and 0.477(2). As for APA-DMF-2:1, cyclobutane ring was conformationally disordered with occupancy ratio 0.63(3)/0.37(3). In APA-DMF-1:1, atoms F1B/F2B of  $-\text{CF}_3$  groups was rotationally disordered over two sites with occupancies equal to 0.556(10)/0.444(10). The studied crystal of APA-DMF-2:1 was pseudomerohedrally twinned with domain ratio 0.922(1)/0.078(1). The crystal APA-DMF-1:1 exhibited racemic twinning with domain ratio 0.75(13)/0.25(13). In APA-DMA-1:1, the fluorine atoms F1-F3 of molecule A and F1-F2 of molecule B of APA were disordered over two positions with occupancies equal to 0.879(3)/0.121(3), for molecule A, 0.755(5)/0.245(5), for molecule B, respectively. All atoms (C22-C25/O3/N6A) of DMA solvate molecules A & B were disordered, and their site occupational factors were refined to 0.654(10)/0.346(10) for molecule A and 0.560(13)/0.440(10) for molecule B, respectively. In APA-CYH-1:1, all the atoms (C22-C27/O3) of the CYH solvate molecule B were disordered over two positions (C23B-C27B/O3B and C23D-C27D/O3D), and their site occupational factors were refined to 0.538(6) and 0.462(6), respectively. In the APA-BUT-1:0.5 structure, the atoms C20/N5/C21 of APA molecule were disordered over two sites (C20/N5/C21 & C20D/N5D/C21D), and their site occupational factors were refined to equal occupancies of 0.5 for both the disordered components. The atoms F2/F3 of APA were disordered over two positions (F2/F3/F4/H15 & F2D/F3D/F4D/H13D), and their occupational factors were refined to 0.879(3)/0.121(3), respectively. In APA-EtOH-2:1, the atoms N5A/C21A and atoms F1-F3 of APA molecule A were disordered over two positions, and their site occupancies (C21A/N5A & C211/N51 and F1A/F2A/F3A & F11/F21/F31) were refined to 0.57(3)/0.43(3) and 0.68(4)/0.32(4), respectively. In APA molecule B, the atoms C20B/N5B/C21B/O2B and F1B/F2B/F3B were disordered, and their site (C20B/N5B/C21B/O2B & C202/N52/C212/O22 and F1B/F2B/F3B & F12/F22/F32)

occupational factors were refined to 0.658(13)/0.342(13) and 0.67(4)/0.33(4), respectively. The EtOH solvate A was disordered over the two-fold symmetry with the site occupancies of 0.5, while the atoms (C22B/C23B/O3B) were disordered over four-fold symmetry, and their disordered components (C22B/C23B/O3B & C222/C232/O32) were refined with 0.25 occupancies.

**Table S2:** Hydrogen-bond geometry (Å, °) for APA

| $D-H\cdots A$               | $D-H$    | $H\cdots A$ | $D\cdots A$ | $D-H\cdots A$ |
|-----------------------------|----------|-------------|-------------|---------------|
| $N5A-H5NA\cdots O2B$        | 0.85 (3) | 2.02 (3)    | 2.854 (2)   | 165 (3)       |
| $N5B-H5NB\cdots O2A^i$      | 0.87 (2) | 2.14 (3)    | 2.998 (2)   | 169 (2)       |
| $C18A-H18A\cdots N4B^{ii}$  | 0.99     | 2.57        | 3.429 (3)   | 145           |
| $C19A-H19B\cdots O1A^{iii}$ | 0.99     | 2.43        | 3.215 (3)   | 135           |
| $C2B-H2B\cdots N4B^{ii}$    | 0.95     | 2.38        | 3.234 (3)   | 149           |
| $C5B-H5B\cdots S1A^{iv}$    | 0.95     | 2.80        | 3.723 (2)   | 165           |
| $C15B-H15B\cdots S1A^v$     | 0.95     | 2.85        | 3.710 (2)   | 152           |

Symmetry codes: (i)  $x, -y+1/2, z-1/2$ ; (ii)  $-x, y-1/2, -z+1/2$ ; (iii)  $-x, -y+1, -z+1$ ; (iv)  $x, -y+3/2, z-1/2$ ; (v)  $-x+1, -y+1, -z+1$ .

**Table S3:** Hydrogen-bond geometry (Å, °) for APA-DMF-2:1

| $D-H\cdots A$               | $D-H$    | $H\cdots A$ | $D\cdots A$ | $D-H\cdots A$ |
|-----------------------------|----------|-------------|-------------|---------------|
| $N5A-H5NA\cdots O2B$        | 0.80 (6) | 2.10 (6)    | 2.870 (6)   | 162 (6)       |
| $N5B-H5NB\cdots O2D$        | 0.94 (6) | 1.85 (6)    | 2.761 (7)   | 163 (5)       |
| $N5C-H5NC\cdots O2A$        | 0.82 (6) | 2.00 (6)    | 2.811 (7)   | 172 (6)       |
| $N5D-H5ND\cdots O2C^i$      | 0.92 (6) | 2.03 (6)    | 2.939 (7)   | 170 (5)       |
| $C2A-H2A\cdots O3A$         | 0.95     | 2.43        | 3.226 (8)   | 141           |
| $C16B-H16B\cdots S1D$       | 0.95     | 2.83        | 3.680 (6)   | 149           |
| $C17B-H17D\cdots F3A^{ii}$  | 0.99     | 2.55        | 3.348 (7)   | 137           |
| $C18B-H18D\cdots O3B$       | 0.99     | 2.45        | 3.405 (7)   | 162           |
| $C21C-H21I\cdots S1B^{iii}$ | 0.98     | 2.84        | 3.746 (7)   | 154           |
| $C2D-H2D\cdots O3B$         | 0.95     | 2.55        | 3.334 (8)   | 140           |

|                               |      |      |            |     |
|-------------------------------|------|------|------------|-----|
| C24A—H24B···N4A <sup>iv</sup> | 0.98 | 2.61 | 3.592 (11) | 180 |
|-------------------------------|------|------|------------|-----|

Symmetry codes: (i)  $x, y+1, z$ ; (ii)  $-x+1, -y+1, -z$ ; (iii)  $-x, -y, -z+1$ ; (iv)  $x-1, y, z$ .

**Table S4:** Hydrogen-bond geometry (Å, °) for APA-DMF-1:1

| <i>D</i> —H··· <i>A</i>        | <i>D</i> —H | H··· <i>A</i> | <i>D</i> ··· <i>A</i> | <i>D</i> —H··· <i>A</i> |
|--------------------------------|-------------|---------------|-----------------------|-------------------------|
| N5A—H5NA···O2B                 | 0.88        | 1.93          | 2.789 (6)             | 163                     |
| N5B—H5NB···O2A <sup>i</sup>    | 0.88        | 2.15          | 2.929 (6)             | 147                     |
| N5C—H5NC···O2D                 | 0.88        | 1.94          | 2.792 (6)             | 162                     |
| N5D—H5ND···O2C <sup>ii</sup>   | 0.88        | 2.15          | 2.932 (6)             | 148                     |
| C5A—H5A···O3A                  | 0.95        | 2.29          | 3.233 (7)             | 171                     |
| C2B—H2B···O3D                  | 0.95        | 2.48          | 3.243 (8)             | 137                     |
| C5C—H5C···O3B                  | 0.95        | 2.33          | 3.275 (7)             | 173                     |
| C2D—H2D···O3C                  | 0.95        | 2.59          | 3.296 (7)             | 132                     |
| C19D—H19H···F2C <sup>iii</sup> | 0.99        | 2.50          | 3.477 (7)             | 168                     |
| C23A—H23A···N4B <sup>ii</sup>  | 0.98        | 2.56          | 3.509 (10)            | 162                     |
| C24B—H24F···O1C                | 0.98        | 2.54          | 3.295 (8)             | 133                     |
| C24C—H24H···O1D                | 0.98        | 2.51          | 3.457 (8)             | 163                     |
| C23D—H23J···O1B                | 0.98        | 2.38          | 3.322 (9)             | 162                     |
| C24D—H24J···N4A <sup>iv</sup>  | 0.98        | 2.56          | 3.437 (8)             | 149                     |

Symmetry codes: (i)  $x-1/2, -y+2, z$ ; (ii)  $x+1/2, -y+1, z$ ; (iii)  $x+1/2, -y+2, z$ ; (iv)  $x, y+1, z$ .

**Table S5:** Hydrogen-bond geometry (Å, °) for APA-DOX-2:1

| <i>D</i> —H··· <i>A</i>       | <i>D</i> —H | H··· <i>A</i> | <i>D</i> ··· <i>A</i> | <i>D</i> —H··· <i>A</i> |
|-------------------------------|-------------|---------------|-----------------------|-------------------------|
| N5A—H5NA···O2B <sup>i</sup>   | 0.83 (2)    | 2.08 (2)      | 2.904 (4)             | 173 (4)                 |
| N5B—H5NB···O2A                | 0.84 (2)    | 2.02 (2)      | 2.849 (4)             | 173 (5)                 |
| C2A—H2A···O3 <sup>ii</sup>    | 0.93        | 2.47          | 3.179 (5)             | 133                     |
| C5A—H5A···S1B <sup>iii</sup>  | 0.93        | 2.82          | 3.681 (4)             | 155                     |
| C15A—H15A···S1B <sup>iv</sup> | 0.93        | 2.79          | 3.611 (4)             | 148                     |
| C5B—H5B···S1A                 | 0.93        | 2.67          | 3.412 (5)             | 138                     |

|                |      |      |           |     |
|----------------|------|------|-----------|-----|
| C22—H22A···N4B | 0.97 | 2.61 | 3.305 (7) | 129 |
|----------------|------|------|-----------|-----|

Symmetry codes: (i)  $x, -y+2, z-1/2$ ; (ii)  $x, y+1, z$ ; (iii)  $x, -y+1, z-1/2$ ; (iv)  $-x+3/2, -y+3/2, -z+1$ .

**Table S6:** Hydrogen-bond geometry (Å, °) for APA-DMA-1:1

| $D-H\cdots A$                  | $D-H$    | $H\cdots A$ | $D\cdots A$ | $D-H\cdots A$ |
|--------------------------------|----------|-------------|-------------|---------------|
| N5A—H5NA···O2B <sup>i</sup>    | 0.85 (3) | 2.12 (3)    | 2.974 (3)   | 177 (3)       |
| N5B—H5NB···O2A                 | 0.79 (3) | 2.06 (3)    | 2.847 (4)   | 171 (3)       |
| C2A—H2A···O3A                  | 0.93     | 2.46        | 3.158 (17)  | 132           |
| C5A—H5A···S1B <sup>ii</sup>    | 0.93     | 2.81        | 3.697 (3)   | 159           |
| C5B—H5B···O3B                  | 0.93     | 2.32        | 3.197 (19)  | 157           |
| C23B—H23H···N4A <sup>iii</sup> | 0.96     | 2.52        | 3.448 (15)  | 162           |

Symmetry codes: (i)  $x, -y+3/2, z-1/2$ ; (ii)  $x, -y+5/2, z-1/2$ ; (iii)  $x, -y+5/2, z+1/2$ .

**Table S7:** Hydrogen-bond geometry (Å, °) for APA-CYH-1:1

| $D-H\cdots A$                 | $D-H$    | $H\cdots A$ | $D\cdots A$ | $D-H\cdots A$ |
|-------------------------------|----------|-------------|-------------|---------------|
| N5A—H5N···O2B                 | 0.77 (4) | 2.15 (4)    | 2.904 (5)   | 165 (4)       |
| N5B—H2N···O2A <sup>i</sup>    | 0.78 (5) | 2.03 (5)    | 2.796 (6)   | 167 (5)       |
| C2A—H2A···O3B                 | 0.95     | 2.59        | 3.37 (3)    | 140           |
| C19A—H19A···F4A <sup>i</sup>  | 0.99     | 2.32        | 3.179 (7)   | 144           |
| C5B—H5B···O3A                 | 0.95     | 2.34        | 3.285 (6)   | 175           |
| C17B—H17C···O3B <sup>i</sup>  | 0.99     | 2.56        | 3.54 (2)    | 168           |
| C21B—H21E···S1B <sup>ii</sup> | 0.98     | 2.85        | 3.753 (5)   | 154           |
| C23B—H23C···O1A               | 0.99     | 2.54        | 3.415 (12)  | 147           |

Symmetry codes: (i)  $x, -y+3/2, z+1/2$ ; (ii)  $-x+1, y+1/2, -z+3/2$ .

**Table S8:** Hydrogen-bond geometry (Å, °) for APA-ACN-1:1

| $D-H\cdots A$              | $D-H$    | $H\cdots A$ | $D\cdots A$ | $D-H\cdots A$ |
|----------------------------|----------|-------------|-------------|---------------|
| N5—H5N···N6                | 0.86 (3) | 2.30 (3)    | 3.155 (3)   | 171 (2)       |
| C2—H2···O2 <sup>i</sup>    | 0.95     | 2.39        | 3.1022 (19) | 132           |
| C12—H12···S1 <sup>ii</sup> | 0.95     | 2.80        | 3.6131 (16) | 144           |

|                             |      |      |             |     |
|-----------------------------|------|------|-------------|-----|
| C15—H15···O1 <sup>iii</sup> | 0.95 | 2.47 | 3.4059 (19) | 168 |
| C18—H18A···N4 <sup>iv</sup> | 0.99 | 2.54 | 3.475 (2)   | 158 |

Symmetry codes: (i)  $-x+1, -y+1, z+1/2$ ; (ii)  $x-1/2, -y+1/2, z$ ; (iii)  $-x+1, -y+1, z-1/2$ ; (iv)  $-x+1/2, y+1/2, z-1/2$ .

**Table S9:** Hydrogen-bond geometry (Å, °) for APA-ACE-2:1

| <i>D</i> —H··· <i>A</i>        | <i>D</i> —H | H··· <i>A</i> | <i>D</i> ··· <i>A</i> | <i>D</i> —H··· <i>A</i> |
|--------------------------------|-------------|---------------|-----------------------|-------------------------|
| N5A—H5NA···O2B <sup>i</sup>    | 0.84 (4)    | 2.10 (4)      | 2.941 (4)             | 177 (4)                 |
| N5B—H5NB···O2A                 | 0.87 (4)    | 1.96 (4)      | 2.794 (4)             | 160 (4)                 |
| C2A—H2A···O3                   | 0.95        | 2.43          | 3.194 (5)             | 137                     |
| C5A—H5A···S1B <sup>ii</sup>    | 0.95        | 2.79          | 3.683 (4)             | 156                     |
| C21A—H21C···S1B <sup>iii</sup> | 0.98        | 2.82          | 3.479 (4)             | 125                     |
| C23—H23B···N4B <sup>iv</sup>   | 0.98        | 2.49          | 3.308 (12)            | 141                     |

Symmetry codes: (i)  $x, -y+3, z-1/2$ ; (ii)  $x, -y+2, z-1/2$ ; (iii)  $-x+1/2, -y+5/2, -z+1$ ; (iv)  $x, y+1, z$ .

**Table S10:** Hydrogen-bond geometry (Å, °) for APA-BUT-1:0.5

| <i>D</i> —H··· <i>A</i>      | <i>D</i> —H | H··· <i>A</i> | <i>D</i> ··· <i>A</i> | <i>D</i> —H··· <i>A</i> |
|------------------------------|-------------|---------------|-----------------------|-------------------------|
| N5—H5N···O2 <sup>i</sup>     | 0.88        | 2.24          | 2.936 (5)             | 136                     |
| O3—H3O···O2                  | 0.84        | 2.10          | 2.699 (5)             | 128                     |
| C24—H24A···O2 <sup>ii</sup>  | 0.99        | 1.59          | 2.491 (7)             | 148                     |
| C24—H24B···F4 <sup>iii</sup> | 0.99        | 2.32          | 3.218 (7)             | 150                     |

Symmetry codes: (i)  $x, -y+5/2, z+1/2$ ; (ii)  $-x, -y+2, -z$ ; (iii)  $x, y, z-1$ .

**Table S11:** Hydrogen-bond geometry (Å, °) for APA-EtOH-2:1

| <i>D</i> —H··· <i>A</i>       | <i>D</i> —H | H··· <i>A</i> | <i>D</i> ··· <i>A</i> | <i>D</i> —H··· <i>A</i> |
|-------------------------------|-------------|---------------|-----------------------|-------------------------|
| N5A—H5NA···O2B                | 0.86        | 2.10          | 2.93 (4)              | 162                     |
| C15A—H15A···O2A <sup>i</sup>  | 0.93        | 2.56          | 3.454 (13)            | 160                     |
| C19B—H19C···F2A <sup>ii</sup> | 0.97        | 2.54          | 3.49 (2)              | 163                     |
| C22A—H22B···O2A <sup>i</sup>  | 0.96        | 2.56          | 3.43 (5)              | 149                     |

Symmetry codes: (i)  $-x+1, -y+1, z$ ; (ii)  $x+1/2, -y+1/2, -z+2$ .

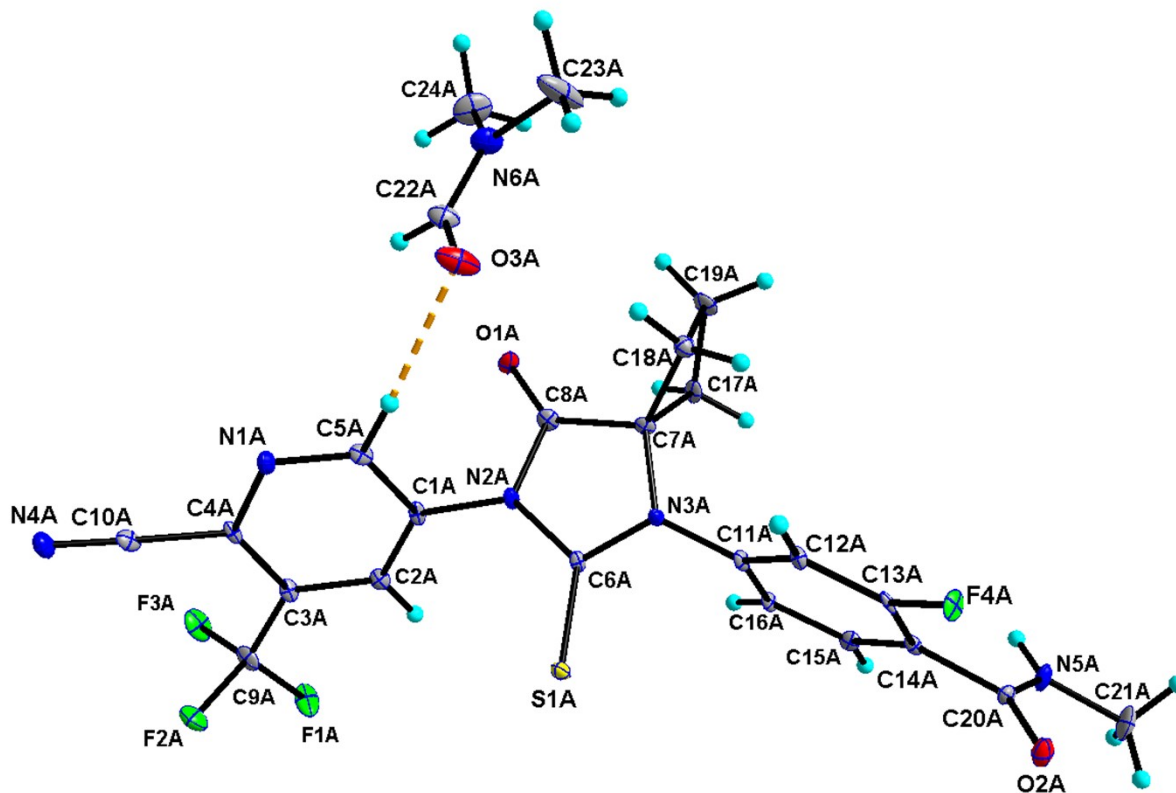

Figure S1. Displacement ellipsoids of APA-DMF-1:1 are drawn at the 30% probability level. Hydrogen bonds are shown as dashed lines. For representative purposes and clarity, only APA molecule A and DMF solvate A are shown. Similar atom numbering is followed for APA molecules B-D and DMF solvates A-D.

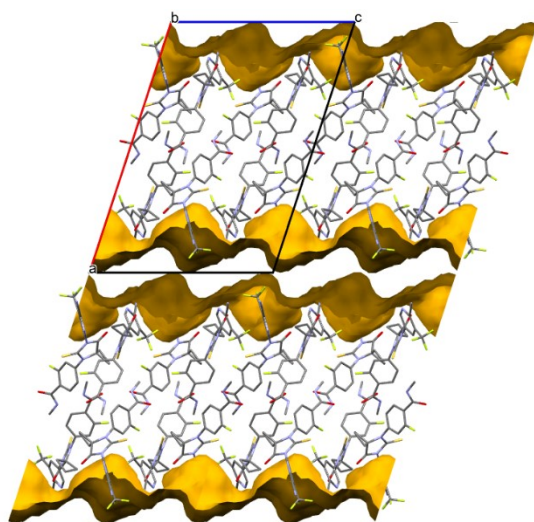

(a)

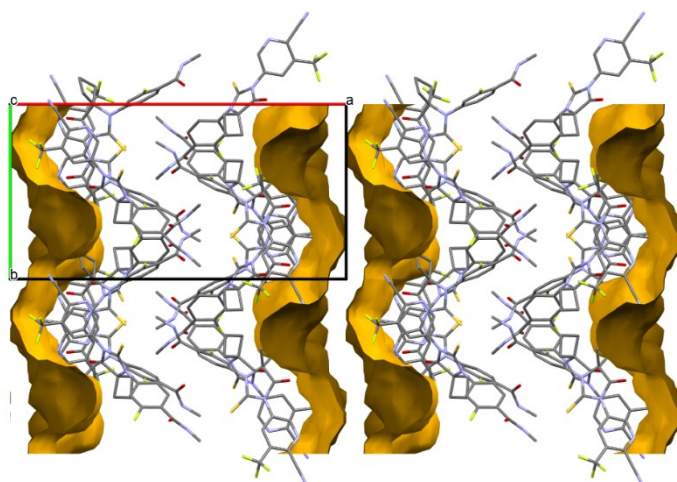

(b)

Figure S2. Packing arrangements and void maps for APA-CYH-1:1 along (a) b-axis and (b) c-axis

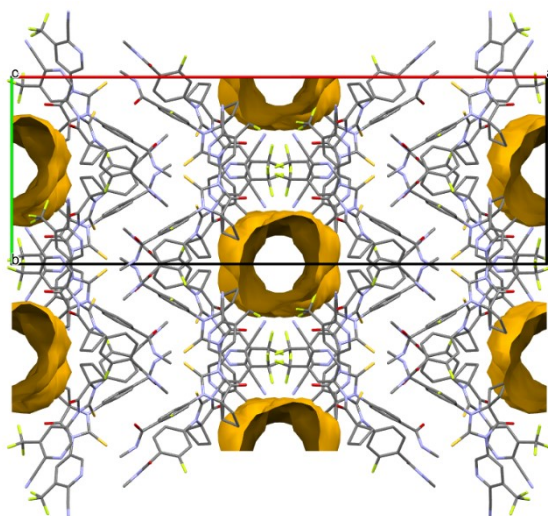

(a)

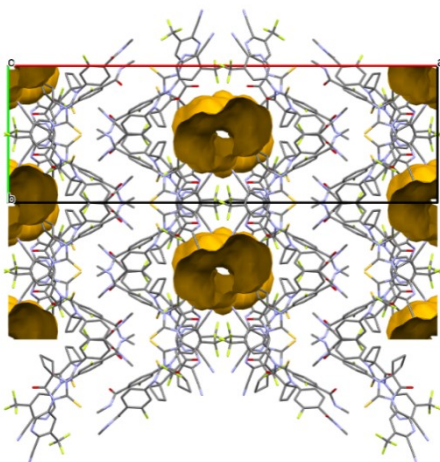

(b)

Figure S3. Packing arrangements and void maps for (a) APA-DOX-2:1 and (b) APA-ACE-2:1 along c-axis

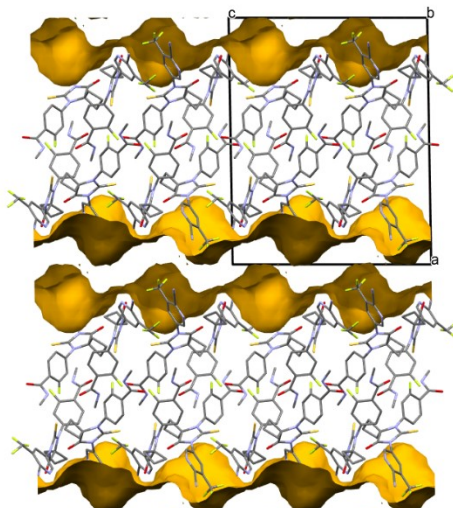

(a)

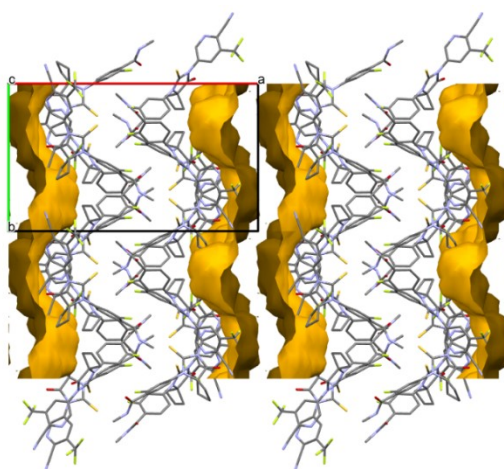

(b)



Figure S4. Packing arrangements and void maps for APA-DMA-1:1 along (a) b-axis and (b) c-axis

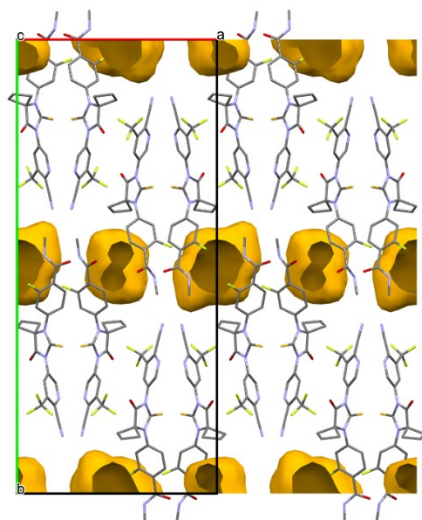

(a)

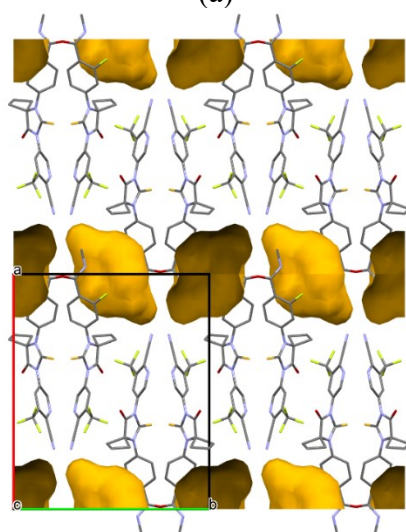

(b)

Figure S5. Packing arrangements and void maps for (a) APA-EtOH-2:1 and (b) APA-BUT-1:0.5 along c-axis

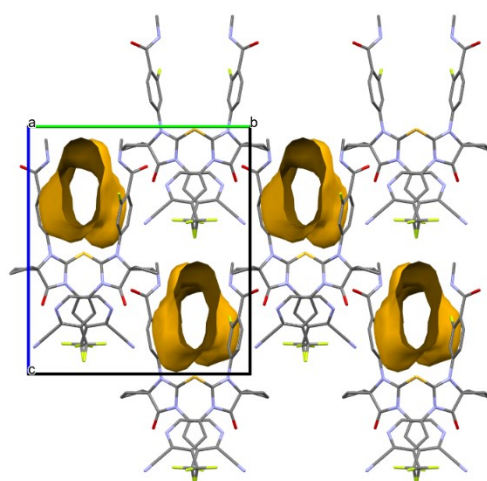

Figure S6. Packing arrangement and void map for APA-ACN-1:1 along a-axis

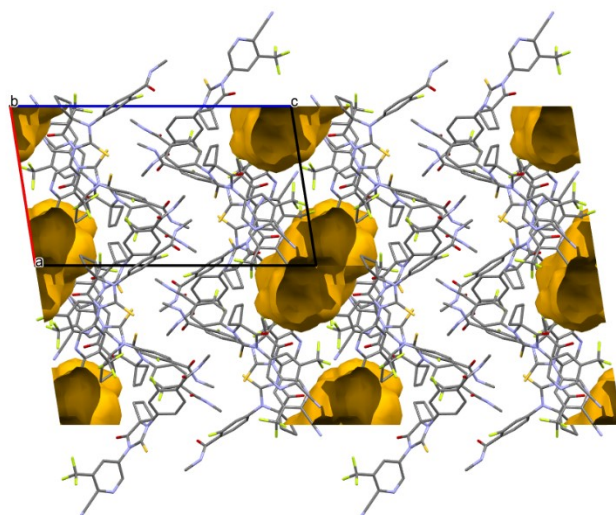

Figure S7. Packing arrangement and void map for APA-DMF-2:1 along b-axis

## HSM studies

### Apalutamide DMF 1:1 solvate (APA-DMF-1:1)

ne plate crystal was selected for HSM studies, the crystal shows two desolvation events, followed by complete melting. The first desolvation was observed from 108°C to 128°C, while the second desolvation was observed from 140°C to 148°C. Finally, the crystal melted at 199°C. Another two HSM experiments were performed in the following temperature ranges 25°C - 130°C and 25°C - 160°C. After that, the crystals were subjected to unit cell determinations. The first crystal unit cell matched with APA-DMF-2:1, while the crystal collected at 150°C unit cell corresponded the APA parent form.

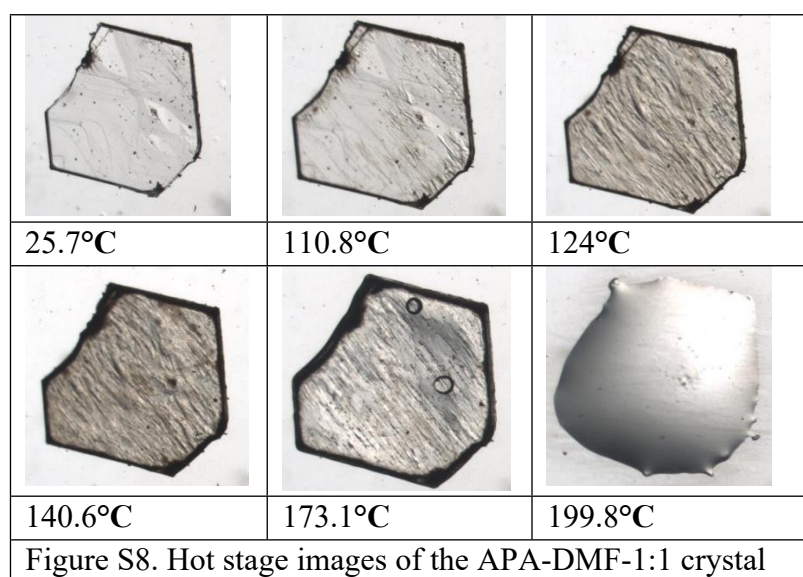

### Apalutamide DMF 2:1 solvate (APA-DMF-2:1)

APA DMF 2:1 plate type crystal was opted for HSM studies where it desolvated from 136°C to 150°C followed by melting at 200°C.

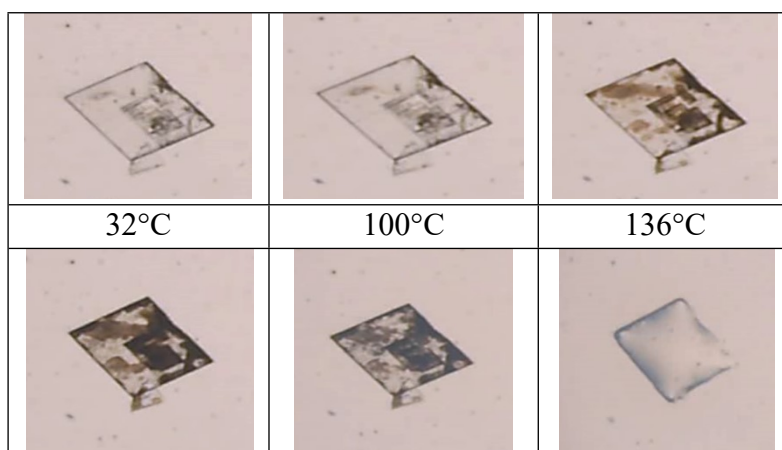

|                                                        |       |       |
|--------------------------------------------------------|-------|-------|
| 160°C                                                  | 191°C | 205°C |
| Figure S.9 Hot stage images of the APA-DMF-2:1 crystal |       |       |

Apalutamide acetone 2:1 solvate (APA-ACE-2:1)

HSM studies were performed for APA Acetone plate type crystal where desolvation started from 97°C-123°C. The crystal lost its transparency after solvent removal, but the original crystal integrity was maintained during the desolvation process.

|                                                                                    |                                                                                    |                                                                                      |
|------------------------------------------------------------------------------------|------------------------------------------------------------------------------------|--------------------------------------------------------------------------------------|
| 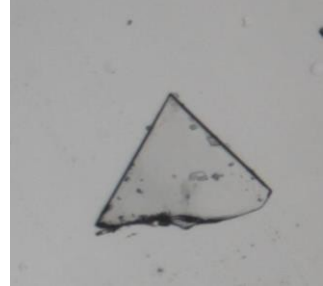  |   |   |
| 28°C                                                                               | 61.2°C                                                                             | 97.2°C                                                                               |
|  |  |  |
| 122.2°C                                                                            | 174.4°C                                                                            | 200.1°C                                                                              |
| Figure S10. Hot stage images of the APA-ACE-2:1 crystal                            |                                                                                    |                                                                                      |

Apalutamide 1,4-dioxane 2:1 solvate (APA-DOX-2:1)

The HSM studies were performed for APA-DOX block shaped crystal in which desolvation started from 110°C-162°C, followed by completely melting at 192°C.

|                                                                                     |                                                                                     |                                                                                       |
|-------------------------------------------------------------------------------------|-------------------------------------------------------------------------------------|---------------------------------------------------------------------------------------|
| 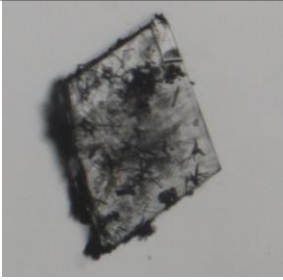 |  |  |
| 26.1°C                                                                              | 118.3°C                                                                             | 133.2°C                                                                               |

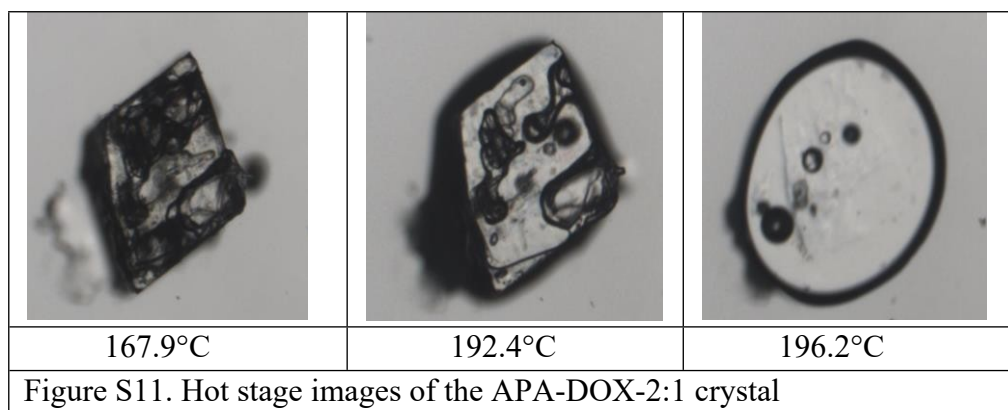

Apalutamide N, N-dimethylacetamide 1:1 solvate (APA-DMA-1:1)

The APA-DMA solvate plate was opted for HSM studies in which it started desolvating from 100°C - 117°C, followed by the melting around 196°C -200.6°C.

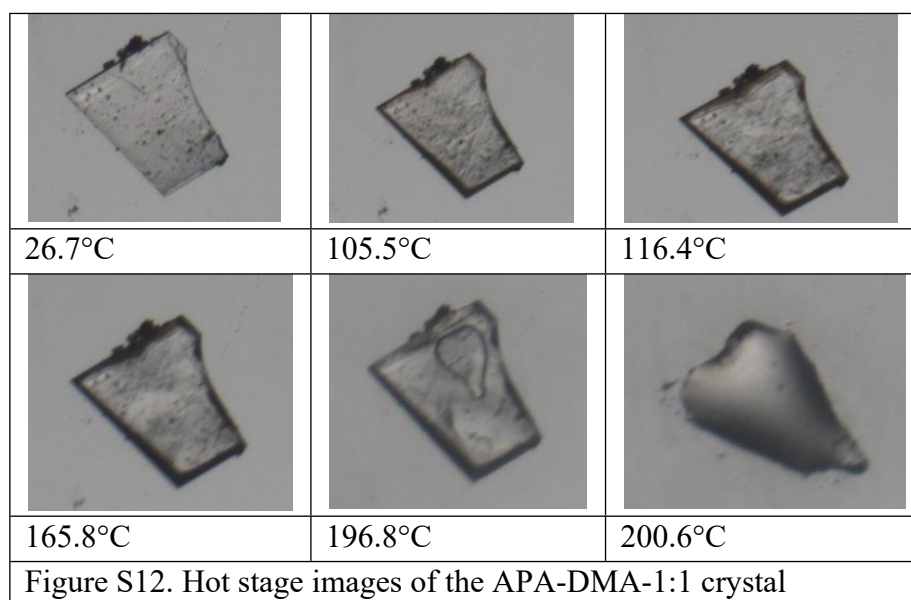

Apalutamide cyclohexanone 1:1 solvate (APA-CYH-1:1)

The APA-CYH plate crystal was subjected to the HSM analysis, which desolvated from 100°C to 125°C, followed by complete melting around 198°C.

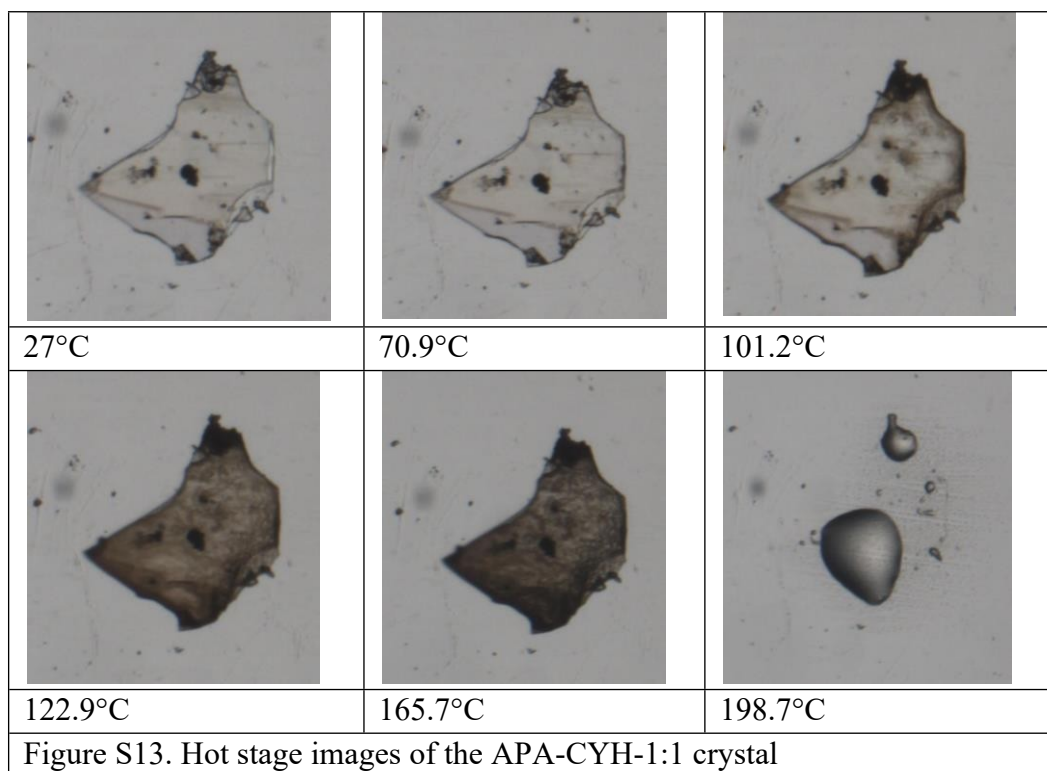

#### Apalutamide ethanol 2:1 solvate (APA-EtOH-2:1)

The HSM studies were performed for APA-EtOH needle type crystals, where desolvation started from 115°C-134°C, followed by complete melting at 201°C.

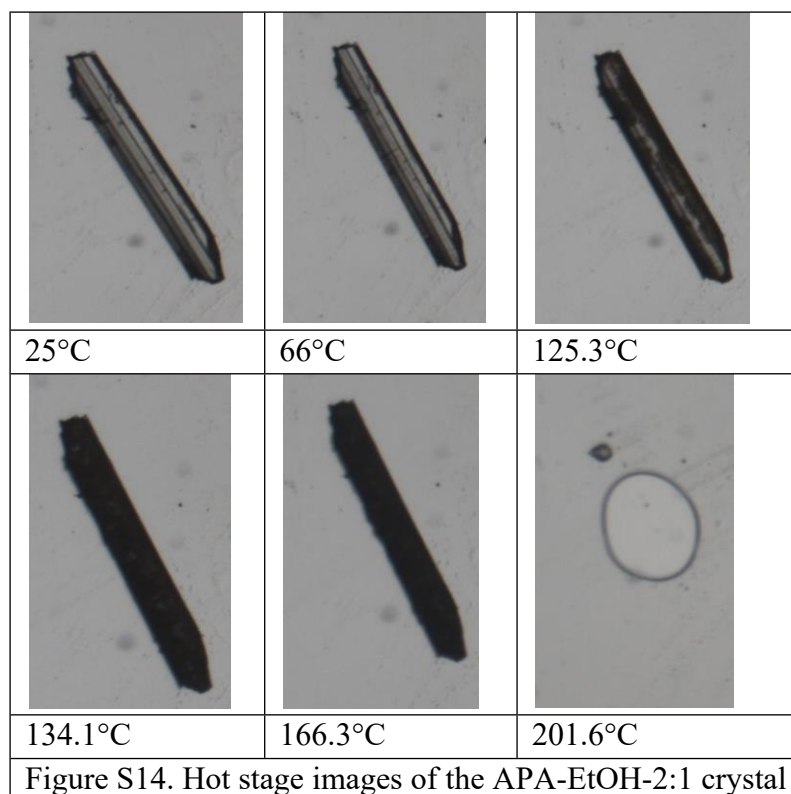

Apalutamide 2-butanol 1:0.5 solvate (APA-BUT-1:0.5)

The APA-BUT plate type crystal was selected for HSM studies. Desolvation started from 111°C-130°C. At round 150°C, crystallization events occurred following by complete melting around 200°C.

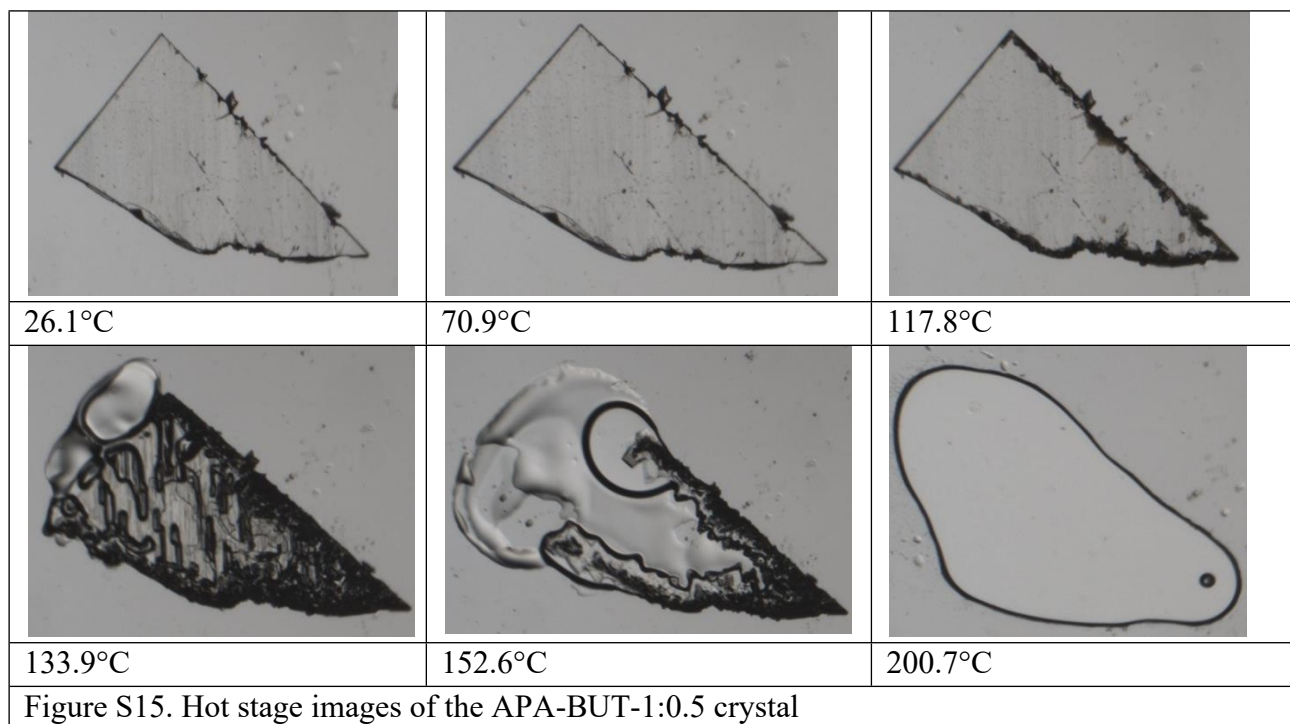

Apalutamide acetonitrile 1:1 solvate (APA-ACN-1:1)

The APA-ACN crystals have selected for HSM studies whose desolvation started from 110°C - 118°C, followed by crystallization around 150- 170°C, after that it is completely melted at 200°C.

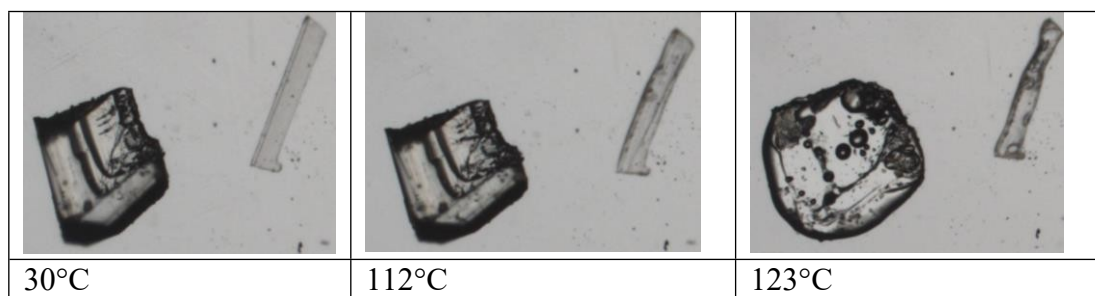

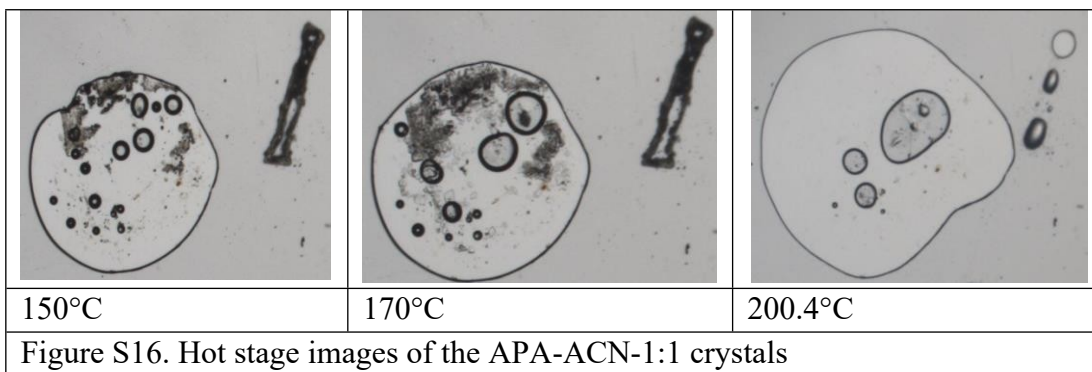

### DSC and TG analysis

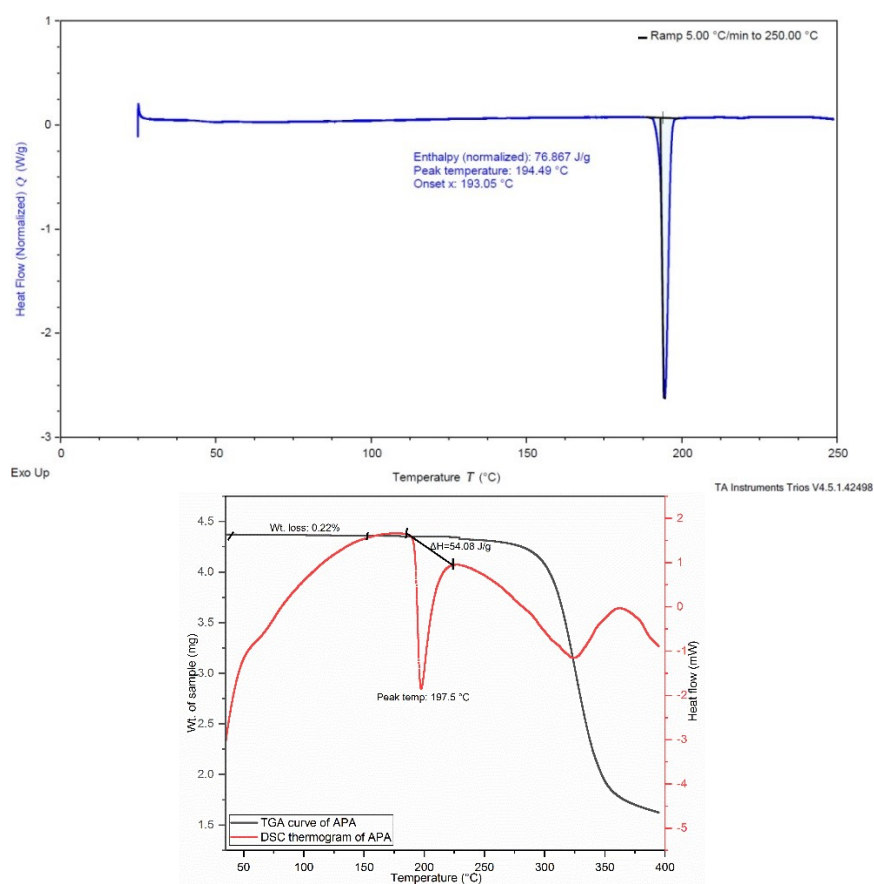

Figure S17. Results of DSC/TG analyses for APA



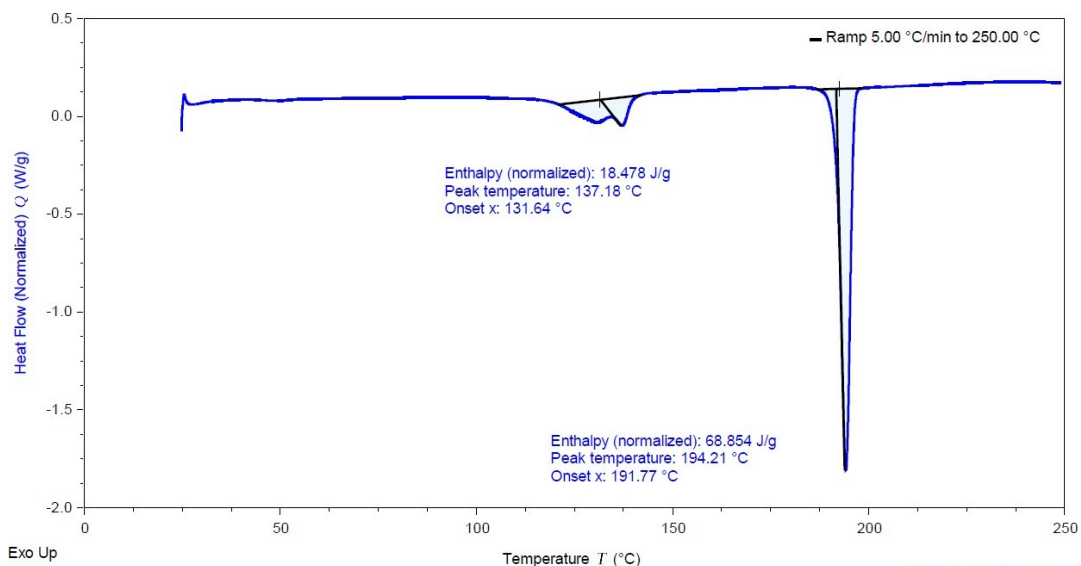

TA Instruments Trios V4.5.1.4

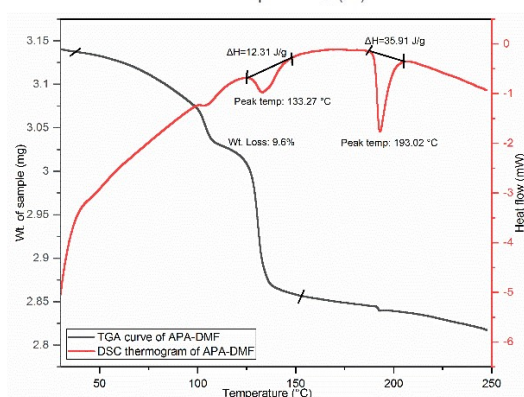

Figure S18. Results of DSC/TG analyses for the APA-DMF-2:1 solvate

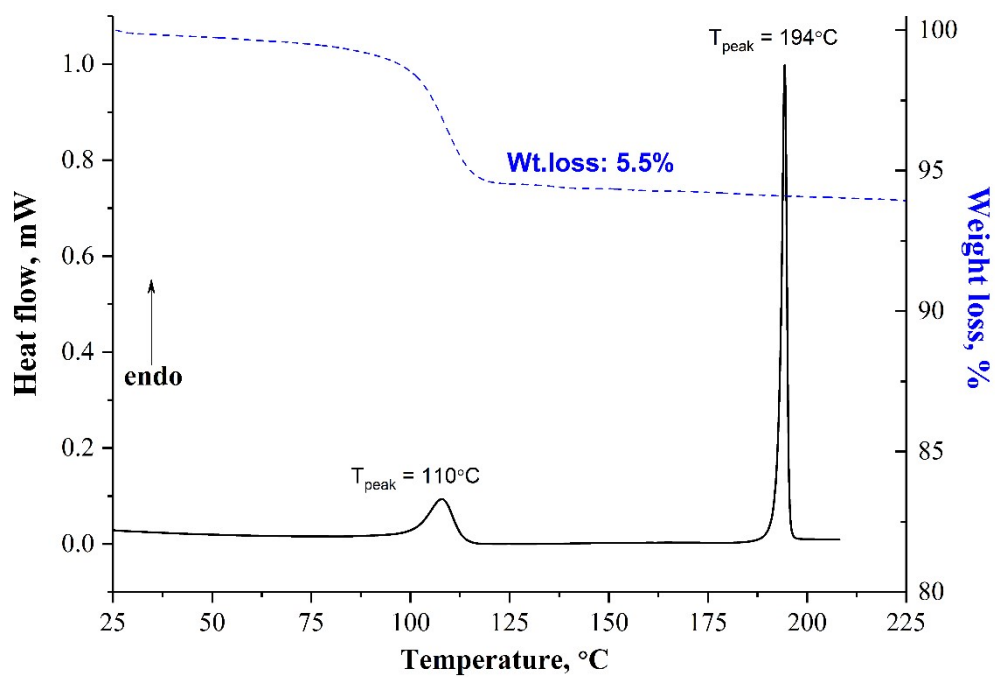

Figure S19. Results of DSC/TG analyses for the APA-ACE-2:1 solvate

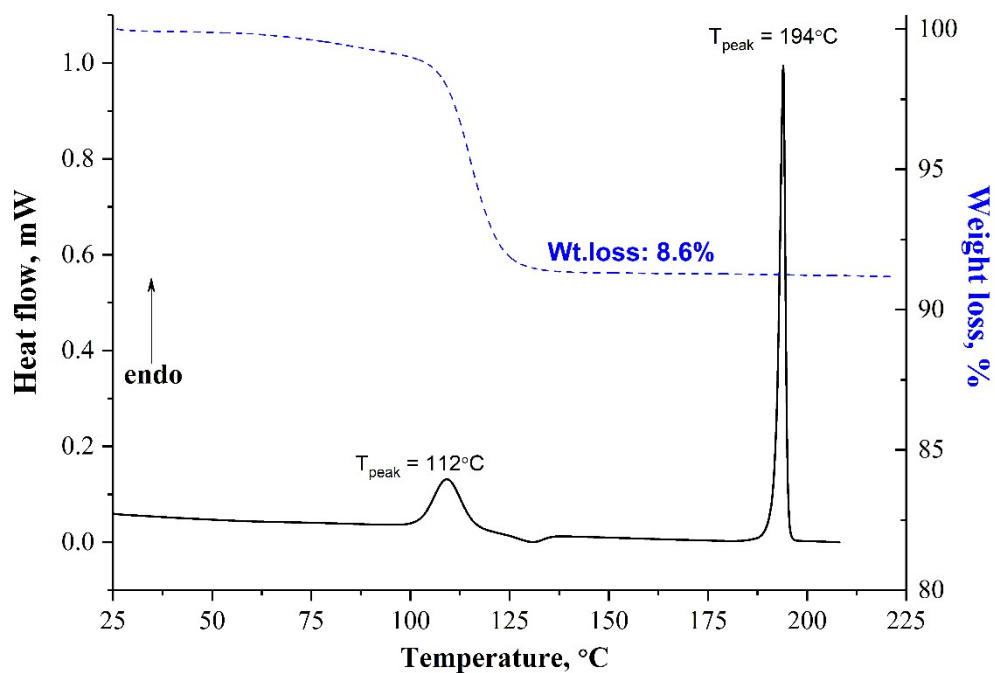

Figure S20. Results of DSC/TG analyses for the APA-DOX-2:1 solvate

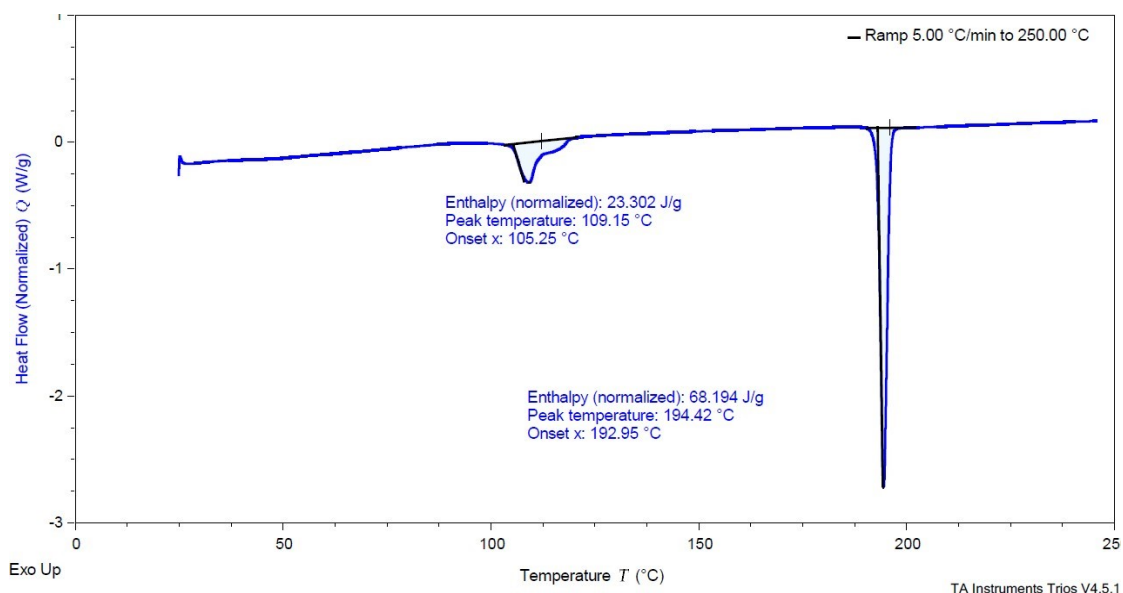

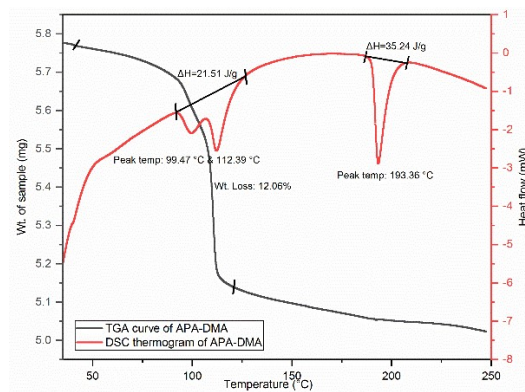

Figure S21. Results of DSC/TG analyses for the APA-DMA-1:1 solvate

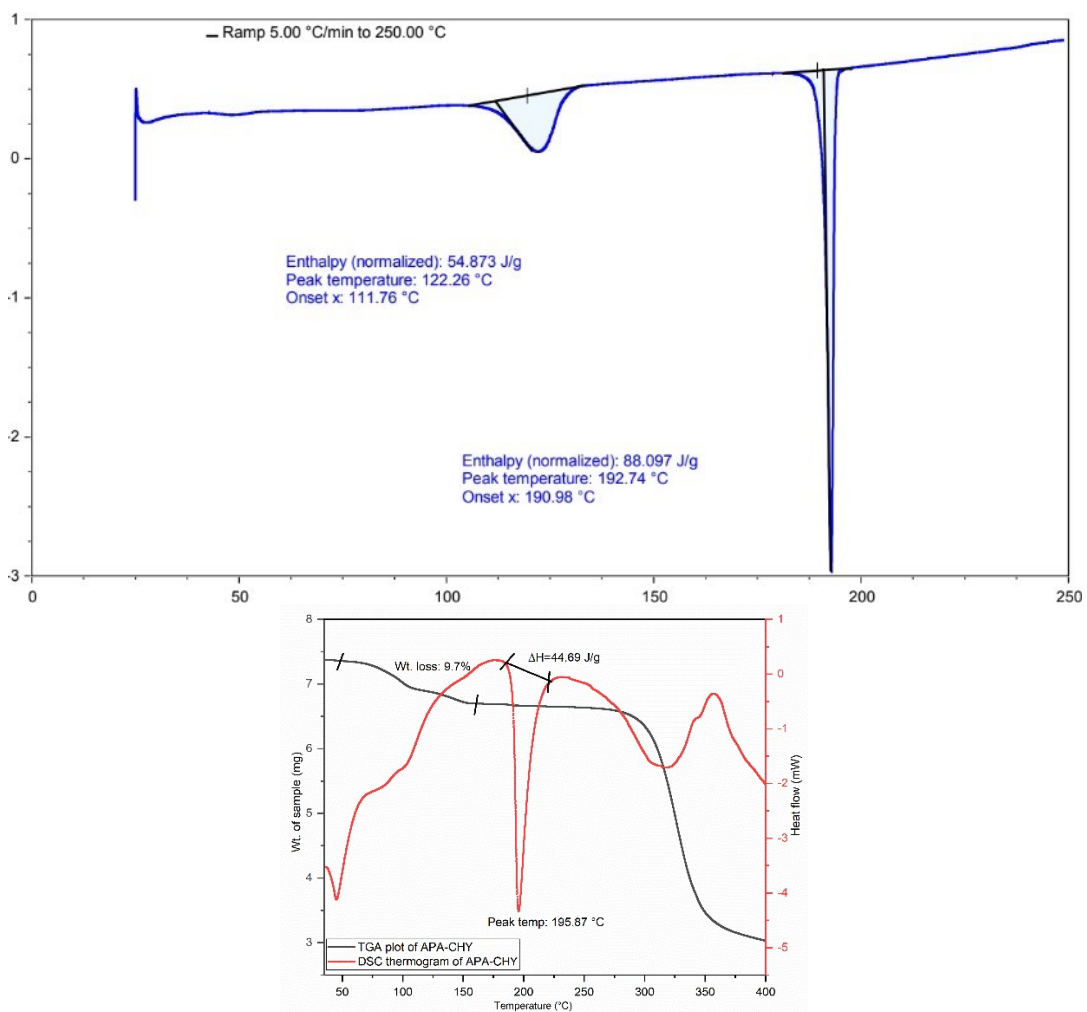

Figure S22. Results of DSC/TG analyses for the APA-CYH-1:1 solvate

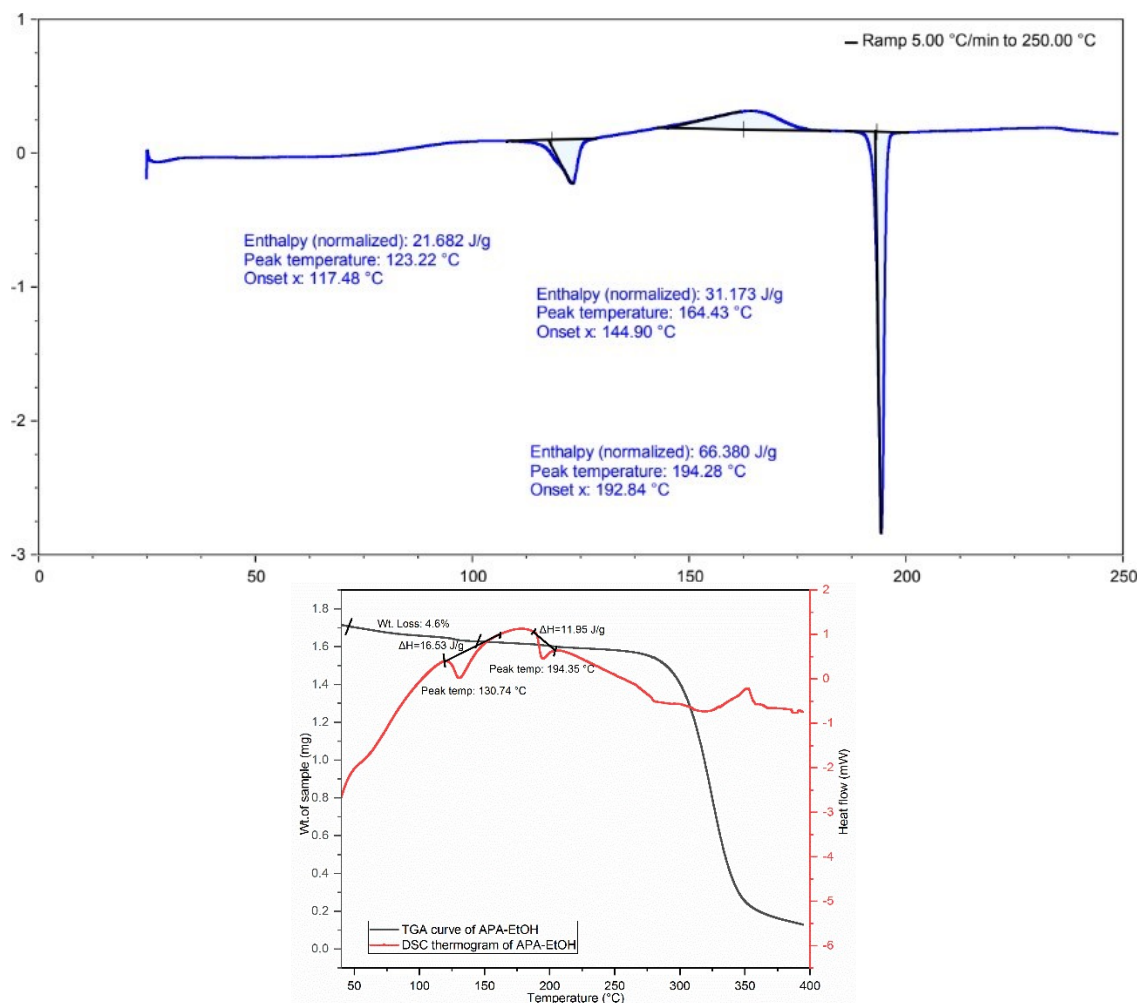

Figure S23. Results of DSC/TG analyses for the APA-EtOH-2:1 solvate

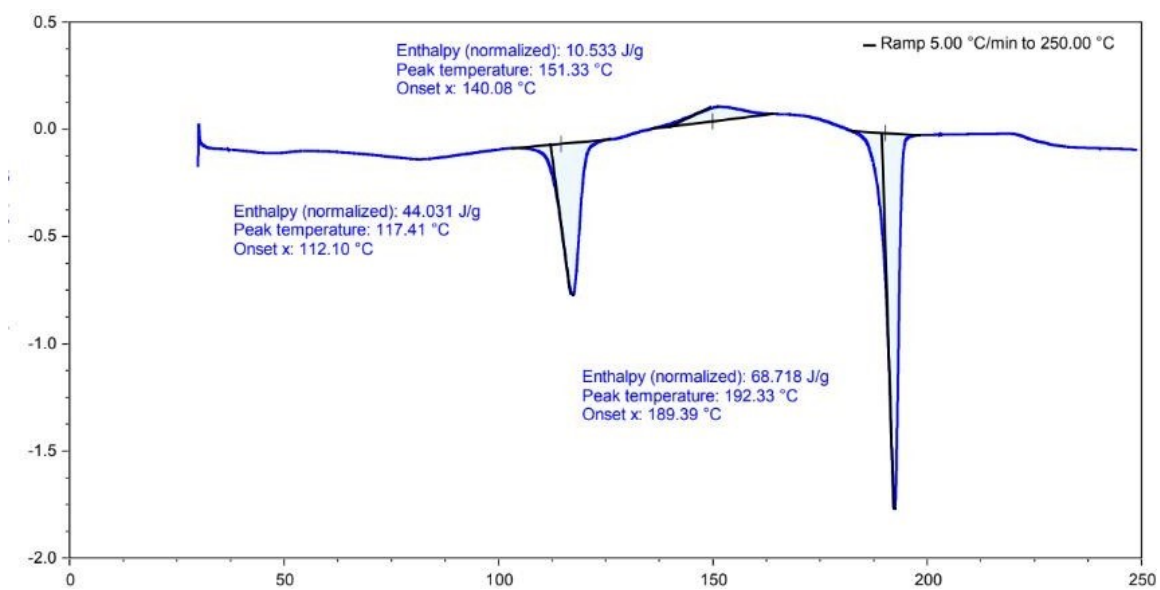

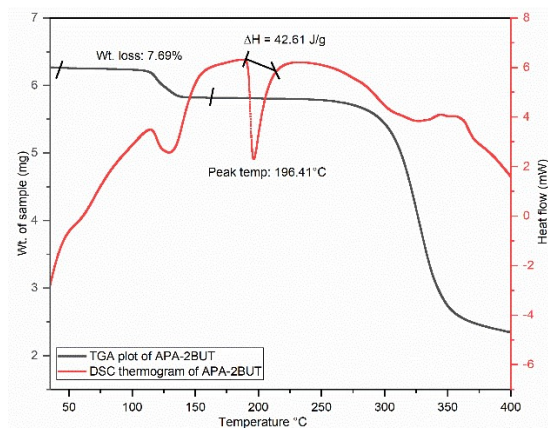

Figure S24. Results of DSC/TG analyses for the APA-BUT-1:0.5 solvate

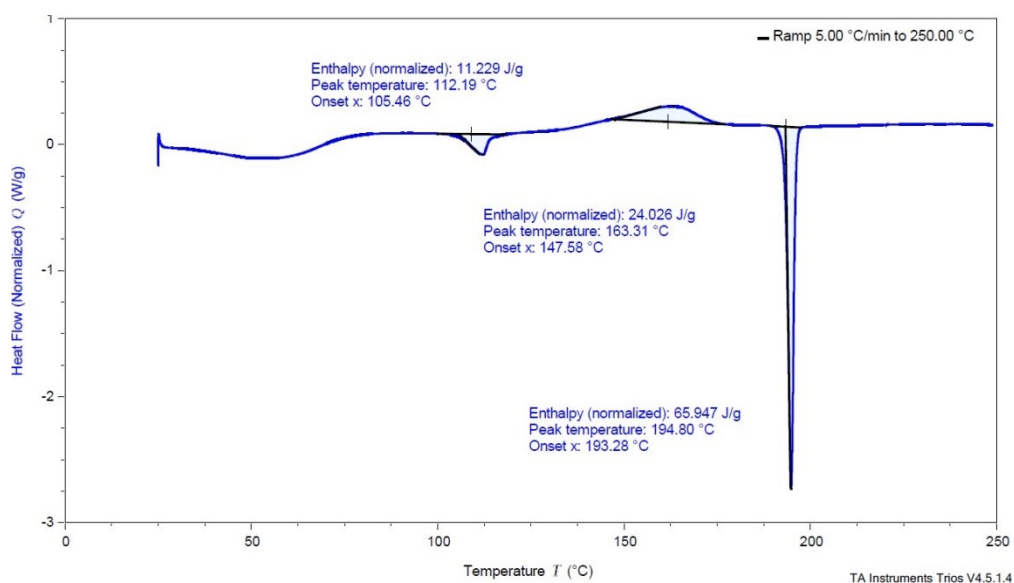

Figure S25. Results of DSC analyses for the APA-ACN-1:1 solvate

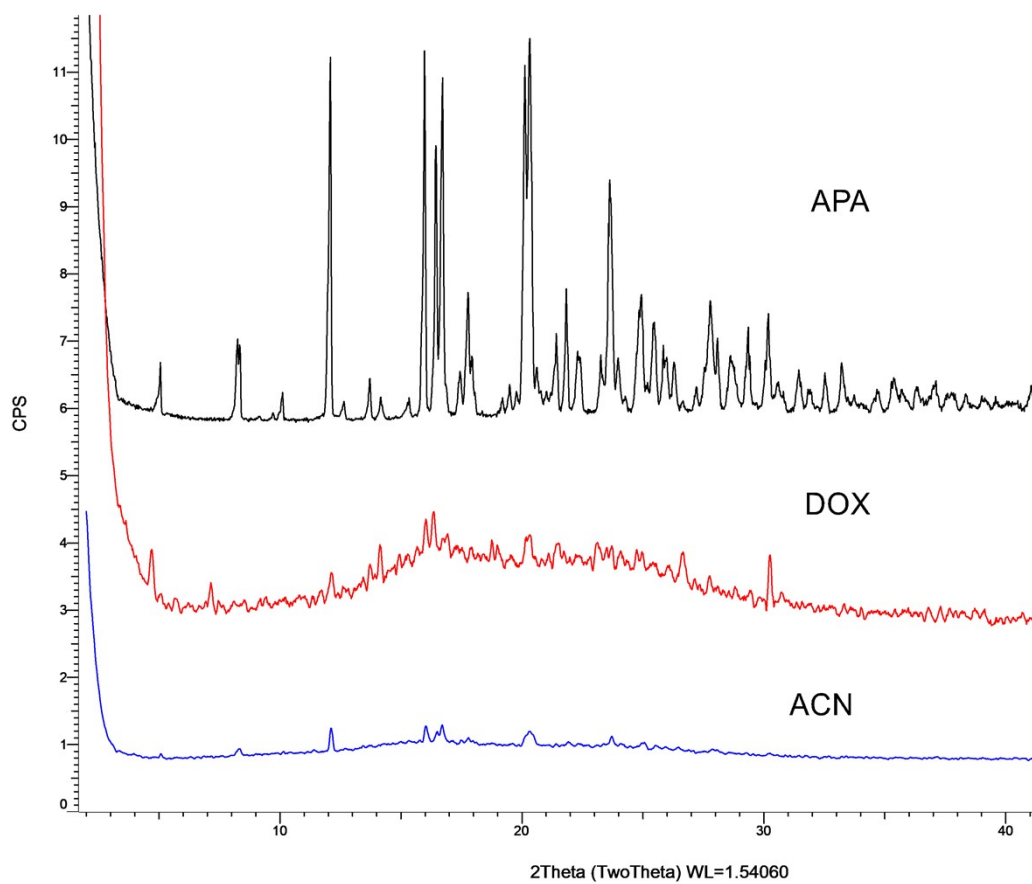

Figure S26. PXR D patterns of residual materials obtained via desolvation of APA-ACN-1:1 and APA-DOX-2:1 solid forms.

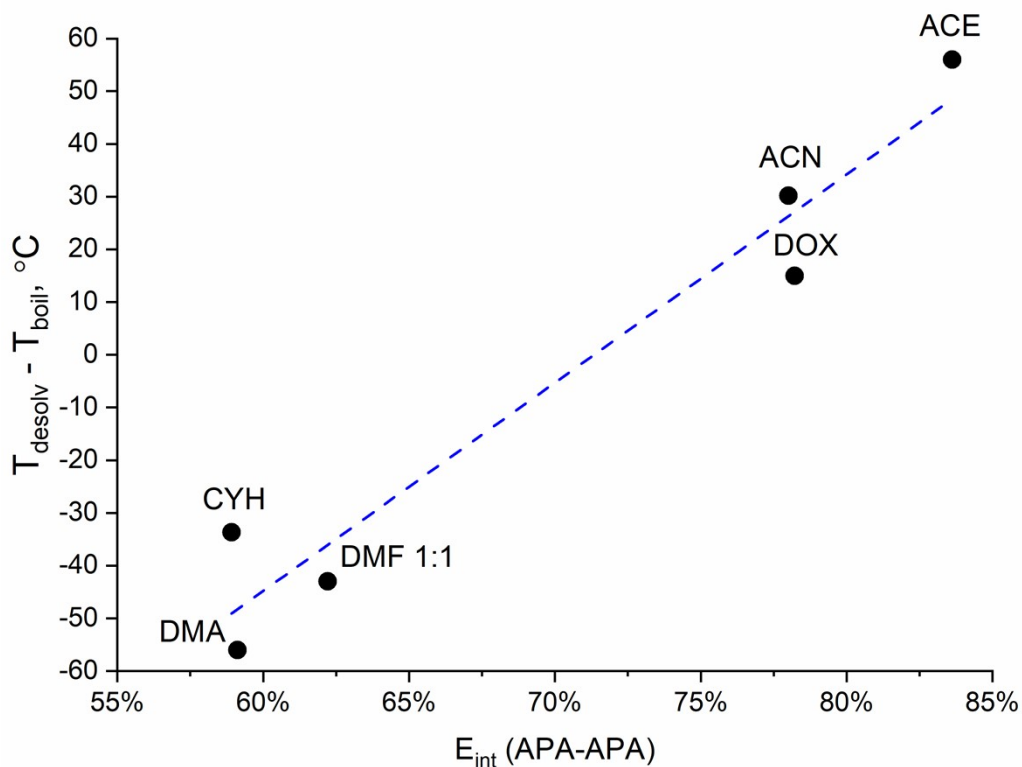

Figure S27. Difference between desolvation temperature of the APA solvate and boiling temperature of pure solvent plotted against the total energy of non-covalent interactions between APA molecules estimated using QTAIMC for open channel solvates

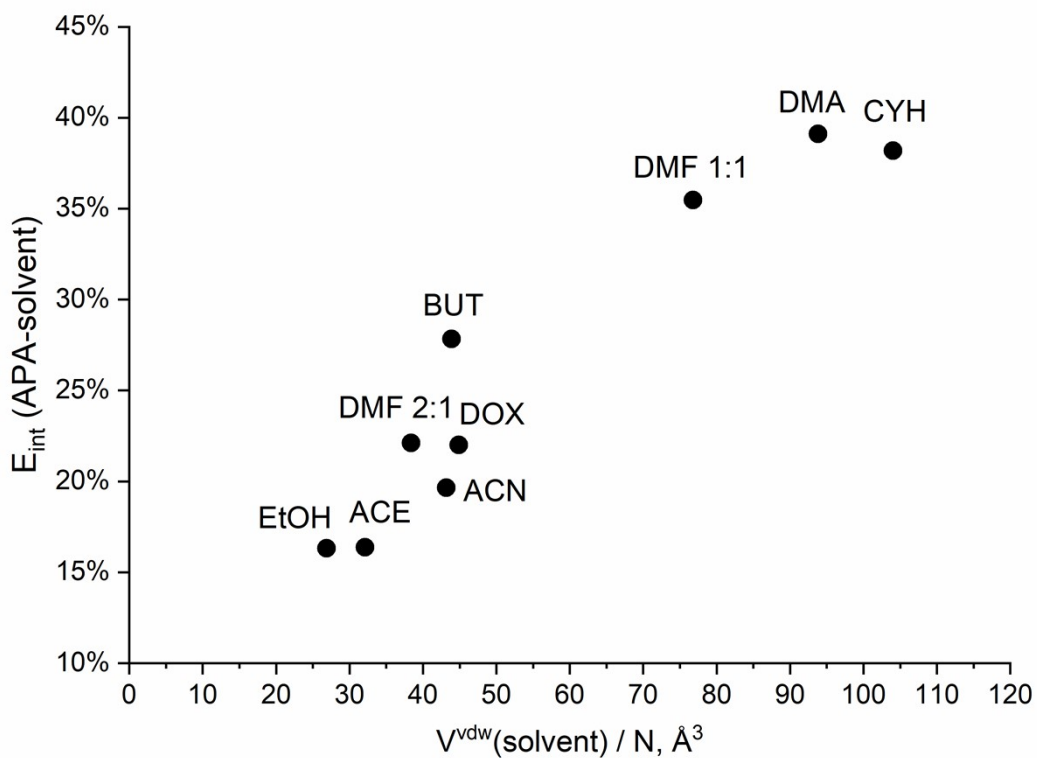

Figure S28. Total energy of non-covalent interactions between APA molecules estimated using QTAIMC plotted against the van-der-Waals volume of solvent molecules with respect to solvate stoichiometry
